# Supplementary material
Source: publisher site journal article supplement (https://www.dovepress.com/article/338404)
Supplement: Supplementary file 1 [file get_supplementary_file.php]

## ***Supporting information***

### Title

**miR-101-5p acts as a tumor suppressor in HER2-positive breast cancer cells and improves targeted therapy**

### Journal

**Breast Cancer: Targets and Therapy**

### Authors

Lisa Svartdal Normann<sup>1,2,3</sup>

Mads Haugland Haugen<sup>2</sup>

Miriam Ragle Aure<sup>3</sup>

Vessela N. Kristensen<sup>3</sup>

Gunhild Mari Mælandsmo<sup>2,4</sup>

Kristine Kleivi Sahlberg<sup>1,2</sup>

### Affiliations

1 Department of Research and Innovation, Vestre Viken Hospital Trust, Drammen, Norway.

2 Department of Tumor Biology, Institute for Cancer Research, Oslo University Hospital, Oslo, Norway.

3 Department of Medical Genetics, Institute of Clinical Medicine, Faculty of Medicine, University of Oslo and Oslo University Hospital, Oslo, Norway

4 Institute for Medical Biology, Faculty of Health Sciences, UiT – The Arctic University of Norway, Tromsø, Norway.

### Correspondence

Dr. K. K. Sahlberg,

Department of Research and Innovation,  
Vestre Viken Hospital Trust, Drammen, Norway.

E-mail: [Kristine.Sahlberg@vestreviken.no](mailto:Kristine.Sahlberg@vestreviken.no)

## ***Supporting information***

**Supplementary Figure S1** HER2 Signaling in Breast Cancer Pathway with colored protein fold change values from KPL4 cells treated with miR-101-5p.

**Supplementary Figure S2** Relative protein expression compared to scrambled negative control of selected apoptosis related proteins.

**Supplementary Table S1:** Protein clusters from the heatmap in Figure 2.

**Supplementary Table S2:** Proteomic data after miR-101-5p overexpression and treatment with lapatinib and trastuzumab.

**Supplementary Table S3:** HER2 signaling pathway analyses.

# Supplementary Figure S1

HER-2 Signaling in Breast Cancer

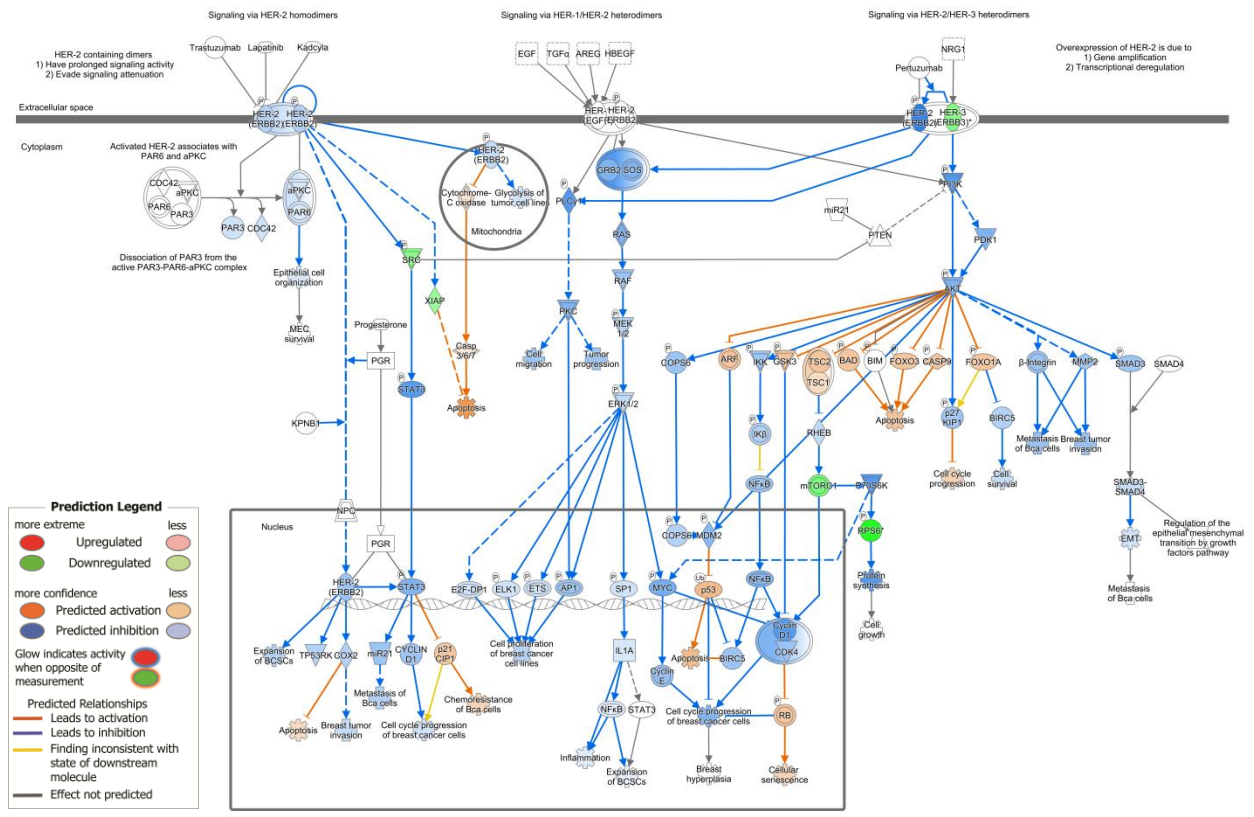

© 2000-2021 QIAGEN. All rights reserved.

**Supplementary Figure S1** HER2 Signaling in Breast Cancer Pathway with colored protein fold change values from KPL4 cells treated with miR-101-5p. The figure is prepared using the IPA software.<sup>29</sup> The prediction tool suggested eg positive regulation (orange) of apoptosis and a negative regulation (blue) of cell survival, progression, metastasis, invasion and epithelial-to-mesenchymal transition (EMT).

# Supplementary Figure S2

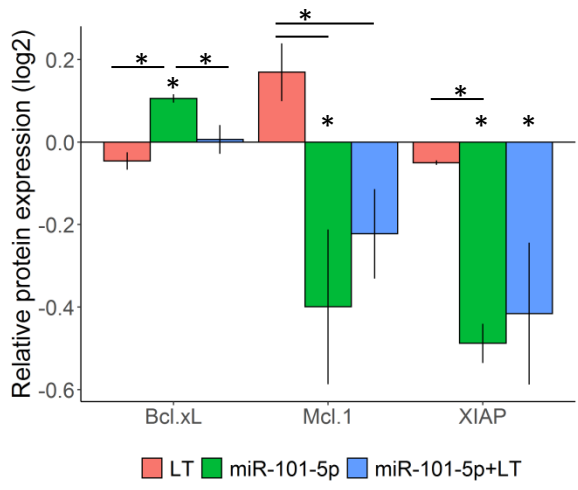

**Supplementary Figure S2** Relative protein expression compared to scrambled negative control of selected apoptosis related proteins. Error bars are standard deviations of three biological replicates. \* $p < 0.05$  (Student's t-test).

## Supplementary Table S1

### Chronological numbering of the clusters

Cluster 1 on top, cluster 5 at the bottom

| Cluster | Protein           |
|---------|-------------------|
| 1       | c.Kit             |
| 1       | Rb_pS807_S811     |
| 1       | EphA2_pS897       |
| 1       | CD31              |
| 1       | Chk2              |
| 1       | Atg7              |
| 1       | Lasu1             |
| 1       | EphA2             |
| 1       | Bad_pS112         |
| 1       | ACC_pS79          |
| 1       | PLC.gamma1_pS1248 |
| 1       | DDR1_pY513        |
| 1       | DUSP4             |
| 1       | EphA2_pY588       |
| 1       | VEGFR.2_pY1175    |
| 1       | FRS2.alpha_pY196  |
| 1       | SHP.2_pY542       |
| 1       | DUSP6             |
| 1       | HER2_pY1248       |
| 1       | HSP60             |
| 1       | PAK1              |
| 1       | cdc25C            |
| 1       | PAICS             |
| 1       | eIF4E             |
| 1       | X4E.BP1           |
| 1       | Paxillin          |
| 1       | TRIP13            |
| 1       | Rad23A            |
| 1       | p44.42.MAPK       |
| 1       | MERIT40           |
| 1       | AceCS1            |
| 1       | DJ1               |
| 1       | Heregulin         |
| 1       | HSP70             |
| 1       | PKA.a             |
| 1       | eIF4E_pS209       |
| 1       | IR.b              |

### meanExpression log2 values

Mean log2 expression values of all proteins per cluster, divided by transfection of miR-101-5p or scrambled negative control (Scr)

| Cluster   | miR-101-5p | Scr   |
|-----------|------------|-------|
| Cluster 1 | 0.10       | -0.07 |
| Cluster 2 | 0.03       | 0.00  |
| Cluster 3 | -0.02      | -0.01 |
| Cluster 4 | -0.04      | 0.02  |
| Cluster 5 | -0.19      | 0.07  |

1 GRB7  
1 EMA  
1 Pcdcd4  
1 MEK1  
1 G6PD  
1 PLC.gamma1  
1 PHGDH  
1 SDHA  
1 Stathmin.1  
1 Notch1  
1 ATM  
1 VASP  
1 Sox2  
1 Tuberin  
1 WIPI2  
1 INPP4b  
1 A.Raf  
1 DRP1  
1 X4E.BP1\_pT37\_T46  
1 RSK  
1 PEA.15  
1 TSC1  
1 C.Raf  
1 Enolase.1  
1 CSK  
1 Grp75  
1 PKM2  
1 NF.kB.p65\_pS536  
1 MMP2  
1 DNMT1  
1 COG3  
1 Chk2\_pT68  
1 PD.L1  
1 PCNA  
1 Smad4  
1 cdc2\_pY15  
1 Akt2  
1 ERCC5  
1 PTEN  
1 eEF2K  
1 MSH6  
1 CHD1L  
1 Mnk1

1 Akt1  
1 Erk5  
1 Gab2  
1 RPA32  
1 PKCa  
1 MSH2  
1 CtIP  
1 SOD1  
1 IRS2  
1 Akt  
1 Claudin.7  
1 ATRX  
1 Smad3  
1 X53BP1  
1 Calnexin  
1 Dvl3  
1 Chk1  
1 c.Jun\_pS73  
1 Aurora.B  
1 PAR  
1 RRM2  
1 Wee1\_pS642  
1 Wee1  
1 MSI2  
1 H2AX\_pS139  
1 Histone.H3  
1 Caspase.7.cleaved.  
1 FOXM1  
1 Cyclin.B1  
1 Annexin.I  
1 Ambra1\_pS52  
1 Puma  
1 p90RSK\_pT573  
1 Bcl.xL  
1 Myt1  
1 Bax  
1 Glutaminase  
1 Aurora.A  
1 Stat3  
1 MLH1  
1 SFRP1  
1 Granzyme.B  
1 PD.1

2 B7.H3  
2 MTCO1  
2 U.Histone.H2B  
2 PKC.delta\_pS664  
2 CD68  
2 MelanA  
2 MYH11  
2 Stat3\_pY705  
2 RRM1  
2 Rictor\_pT1135  
2 ERRalpha  
2 c.Abl\_pY412  
2 YB1\_pS102  
2 p27\_pT157  
2 p38.a  
2 SF2  
2 Annexin.VII  
2 H2AX\_pS140  
2 CD171  
2 Rab11  
2 Bim  
2 Fibronectin  
2 HMHA1  
2 EGFR  
2 Caveolin.1  
2 Cox2  
2 PDH  
2 Notch1.cleaved  
2 ZEB1  
2 Enolase.2  
2 HER2  
2 PARG  
2 DNA\_POLG  
2 PHLPP  
2 Jak2  
2 MMP14  
2 VAV1  
2 E.Cadherin  
2 PREX1  
2 CDT1  
2 Akt2\_pS474  
2 IL.6  
2 GATA3



2 N.Cadherin  
2 Akt1\_pS473  
2 CD4  
2 Melanoma.gp100  
2 CDKN2A  
2 IDO  
2 Cyclin.D1  
2 p38.MAPK.\_pT180\_Y182  
2 MITF  
2 c.Met\_pY1234\_Y1235  
2 CIITA  
2 IRS1  
2 X14.3.3.beta  
2 HLA.DR.DP.DQ.DX  
2 SOD2  
2 PR  
2 CA9  
2 Rab25  
2 UBQLN4  
2 CD5  
2 DNA.Ligase.IV  
2 LAD1  
2 MR1  
2 CD38  
2 b.Catenin\_pT41\_S45  
2 CD44  
2 FASN  
2 PMS2  
2 Glutamate.D1.2  
2 IGFRb  
2 Bcl2  
2 GATA6  
2 S100A4  
2 GGPS1  
2 B.Raf  
2 Slfn11  
2 MTSS1  
2 TRAP1  
2 TUFM  
2 IGF1R\_pY1135\_Y1136  
2 p21  
2 IGFBP2  
2 DDB.1

2 ACC1  
2 JNK\_pT183\_Y185  
2 Syk  
2 Caspase.3.cleaved  
2 VHL  
2 Histone.H3\_pS10  
2 ENY2  
2 Rad51  
2 VHL.EPPK1  
2 Transglutaminase  
2 Complex.II.Subunit  
2 Myosin.IIa\_pS1943  
2 p38.MAPK  
2 UQCRC2  
3 Rad50  
3 Elk1\_pS383  
3 EGFR\_pY1173  
3 Caspase.8  
3 GAPDH  
3 MAPK\_pT202\_Y204  
3 Chk1\_pS345  
3 PKC.b.II\_pS660  
3 Atg5  
3 HSP27\_pS82  
3 MEK1\_p\_S217\_S221  
3 Cox.IV  
3 S6  
3 AMPKa  
3 Merlin  
3 MDM2\_pS166  
3 Aurora.ABC\_pT288\_pT232\_pT198  
3 Cdc6  
3 KAP1  
3 TFRC  
3 PRC1\_pT481  
3 ADAR1  
3 TRIM25  
3 RBM15  
3 HNRNPK  
3 RPA32\_pS4\_S8  
3 BRD4  
3 TIGAR  
3 Mitofusin.2

3 IGFBP3  
3 UGT1A  
3 PARP  
3 STING  
3 Stat1\_pY701  
3 BAP1  
3 ER.a\_pS118  
3 DM.K9.Histone.H3  
3 Axl  
3 b.Catenin  
3 TTF1  
3 Tau  
3 Stat5a  
3 ATR\_pS428  
3 Gli1  
3 p53  
3 RIP3  
3 BRCA1  
3 MRAP  
3 c.IAP2  
3 PERK  
3 P.Cadherin  
3 Lck  
3 Porin  
3 CREB\_pS133  
3 AMPK.a2\_pS345  
3 Pyk2\_pY402  
3 B7.H4  
3 SCD  
4 EVI1  
4 Cyclophilin.F  
4 BiP.GRP78  
4 MIF  
4 FoxO3a\_pS318\_S321  
4 IRF.1  
4 Ets.1  
4 MIG6  
4 PKC.a.b.II\_pT638\_T641  
4 LDHA  
4 GCLM  
4 PDHA1  
4 FABP5  
4 HSP27

4 ATR  
4 Jagged1  
4 Gli3  
4 Connexin.43  
4 A.Raf\_pS299  
4 c.Myc  
4 PAK4  
4 YAP  
4 PAX6  
4 CD45  
4 N.Ras  
4 CD49b  
4 Rheb  
4 C.Raf\_pS338  
4 CRABP2  
4 XPF  
4 CD20  
4 X14.3.3.zeta  
4 CD134  
4 Myosin.IIa  
4 Cyclin.E1  
4 PRAS40  
4 CD29  
4 BMK1.Erk5\_pT218\_Y220  
4 E2F1  
4 IRF.3  
4 p27.Kip1  
4 Src\_pY416  
4 CDK1\_pT14  
4 GCN5L2  
4 Lyn  
4 YES1  
4 Src  
4 Collagen.VI  
4 MEK2  
4 PAI.1  
4 b.Actin  
4 AMPKa\_pT172  
4 PDK1\_pS241  
4 PI3K.p85  
4 Atg4B  
4 Cdc42  
4 NRF2

4 DAPK2  
4 LRP6\_pS1490  
4 NDUFB4  
4 Sox17  
4 PLC.gamma2\_pY759  
4 Mitofusin.1  
4 ATM\_pS1981  
4 XRCC1  
4 Cyclin.D3  
4 HLA.DQA1  
4 D.a.Tubulin  
4 Oct.4  
4 UVRAG  
4 Bak  
4 B.Raf\_pS445  
4 p70.S6K1  
4 RSK1  
4 Bid  
4 Atg3  
4 UBAC1  
4 ASNS  
4 X4E.BP1\_pS65  
4 Gys  
4 MCT4  
4 SLC1A5  
4 ATP5H  
4 ZAP.70  
4 Tyro3  
4 Coup.TFII  
4 BCL2A1  
4 Creb  
4 ACVRL1  
4 c.Abl  
4 Patched  
4 CD26  
4 PDK1  
4 Chk1\_pS296  
4 Beclin  
4 MLKL  
4 Notch3  
4 RIP  
4 PDHK1  
4 WIPI1

4 PYGB  
4 NAPSIN.A  
5 X14.3.3.epsilon  
5 Rb  
5 HES1  
5 Snail  
5 LC3A.B  
5 FAK  
5 Tuberin\_pT1462  
5 GCLC  
5 NQO1  
5 PLK1  
5 Src\_pY527  
5 ATP5A  
5 p27\_pT198  
5 PRAS40\_pT246  
5 HER3\_pY1289  
5 eIF4G  
5 Rictor  
5 GSK.3B  
5 Gys\_pS641  
5 S6\_pS235\_S236  
5 S6\_pS240\_S244  
5 FAK\_pY397  
5 mTOR\_pS2448  
5 ULK1\_pS757  
5 XIAP  
5 HER3  
5 ARID1A  
5 Mcl.1  
5 TAZ  
5 GSK.3a.b  
5 SHP2  
5 Vinculin  
5 eEF2  
5 Raptor  
5 Smad1  
5 FN14  
5 PI3K.p110.a  
5 Hexokinase.I  
5 Hexokinase.II  
5 FGF.basic  
5 VEGFR.2

5 PEA.15\_pS116  
5 JNK2  
5 Shc\_pY317  
5 PAX8  
5 Akt\_pS473  
5 Twist  
5 JAB1  
5 Akt\_pT308  
5 ERCC1  
5 GSK.3a.b\_pS21\_S9  
5 PYGM  
5 Smac  
5 DDR1  
5 ACLY\_pS455  
5 Hif.1.alpha  
5 ACSL1  
5 ER.a  
5 SGK3  
5 XPA  
5 AR  
5 PTPN12  
5 mTOR  
5 SGK1  
5 p70.S6K\_pT389  
5 NDRG1\_pT346  
5 MERIT40\_pS29  
5 YAP\_pS127  
5 FOXO3  
5 TFAM  
5 PI3K.p110.b

**Supplementary Table S2****Fold change (FC) and p-values (Student's t-test) upon treatment of KPL4 cells with miR-101-5p overexpression and/or lapatinib and trastuzumab.****101 = miR-101-5p****LT = Lapatinib and Trastuzumab****Ctr = scrambled negative control**

|                 |           | FC       | p-value  | FC      | p-value | FC         | p-value    | FC        | p-value   | FC         | p-value    | FC      | p-value |
|-----------------|-----------|----------|----------|---------|---------|------------|------------|-----------|-----------|------------|------------|---------|---------|
| Protein         | Gene Name | 101vsCtr | 101vsCtr | LTvsCtr | LTvsCtr | 101LTvsCtr | 101LTvsCtr | 101LTvsLT | 101LTvsLT | 101LTvs101 | 101LTvs101 | 101vsLT | 101vsLT |
| 14-3-3-beta     | YWHAB     | 0.08     | 0.13     | 0.12    | 0.10    | 0.19       | 0.26       | 0.08      | 0.60      | 0.11       | 0.47       | -0.03   | 0.56    |
| 14-3-3-epsilon  | YWHAE     | -0.06    | 0.73     | 0.00    | 0.93    | -0.05      | 0.61       | -0.06     | 0.59      | 0.00       | 1.00       | -0.06   | 0.71    |
| 14-3-3-zeta     | YWHAZ     | -0.13    | 0.09     | -0.19   | 0.05    | -0.13      | 0.11       | 0.06      | 0.23      | 0.00       | 0.98       | 0.06    | 0.14    |
| 4E-BP1          | EIF4EBP1  | 0.28     | 0.06     | -0.25   | 0.06    | 0.04       | 0.69       | 0.30      | 0.04      | -0.24      | 0.09       | 0.54    | 0.01    |
| 4E-BP1_pS65     | EIF4EBP1  | -0.17    | 0.08     | -0.12   | 0.07    | -0.29      | 0.01       | -0.16     | 0.05      | -0.12      | 0.16       | -0.04   | 0.52    |
| 4E-BP1_pT37_T46 | EIF4EBP1  | -0.04    | 0.77     | -0.14   | 0.13    | -0.13      | 0.15       | 0.01      | 0.79      | -0.09      | 0.56       | 0.10    | 0.51    |
| 53BP1           | TP53BP1   | 0.34     | 0.01     | 0.05    | 0.63    | 0.30       | 0.07       | 0.25      | 0.11      | -0.04      | 0.74       | 0.29    | 0.03    |
| A-Raf           | ARAF      | -0.04    | 0.80     | -0.13   | 0.18    | 0.00       | 0.98       | 0.13      | 0.05      | 0.04       | 0.80       | 0.09    | 0.52    |
| A-Raf_pS299     | ARAF      | -0.04    | 0.72     | -0.10   | 0.10    | -0.05      | 0.45       | 0.05      | 0.47      | -0.01      | 0.96       | 0.05    | 0.65    |
| ACC1            | ACACA     | 0.18     | 0.22     | 0.03    | 0.88    | 0.07       | 0.50       | 0.04      | 0.83      | -0.12      | 0.42       | 0.16    | 0.45    |
| ACC_pS79        | ACACA     | 0.03     | 0.85     | -0.35   | 0.12    | -0.43      | 0.07       | -0.08     | 0.58      | -0.46      | 0.03       | 0.38    | 0.07    |
| AceCS1          | ACSS2     | 0.26     | 0.21     | -0.04   | 0.77    | 0.25       | 0.13       | 0.29      | 0.12      | -0.02      | 0.93       | 0.31    | 0.18    |
| ACLY_pS455      | ACLY      | -0.13    | 0.01     | 0.05    | 0.49    | -0.07      | 0.34       | -0.12     | 0.22      | 0.05       | 0.45       | -0.18   | 0.09    |
| ACSL1           | ACSL1     | -0.16    | 0.05     | 0.24    | 0.29    | -0.06      | 0.42       | -0.30     | 0.21      | 0.10       | 0.22       | -0.40   | 0.14    |
| ACVRL1          | ACVRL1    | -0.05    | 0.46     | 0.02    | 0.52    | -0.02      | 0.67       | -0.05     | 0.38      | 0.02       | 0.74       | -0.07   | 0.28    |
| ADAR1           | ADAR      | 0.07     | 0.48     | 0.11    | 0.36    | 0.05       | 0.79       | -0.06     | 0.72      | -0.03      | 0.88       | -0.04   | 0.73    |
| Akt             | AKT1      | 0.47     | 0.02     | 0.25    | 0.11    | 0.42       | 0.05       | 0.17      | 0.31      | -0.05      | 0.73       | 0.22    | 0.16    |
| Akt1            | AKT1      | 0.28     | 0.05     | 0.15    | 0.03    | 0.30       | 0.00       | 0.15      | 0.02      | 0.03       | 0.77       | 0.13    | 0.23    |
| Akt1_pS473      | AKT1      | 0.00     | 0.96     | 0.14    | 0.21    | 0.12       | 0.18       | -0.02     | 0.82      | 0.12       | 0.19       | -0.14   | 0.22    |
| Akt2            | AKT2      | 0.30     | 0.01     | 0.02    | 0.72    | 0.27       | 0.04       | 0.24      | 0.05      | -0.04      | 0.65       | 0.28    | 0.00    |
| Akt2_pS474      | AKT2      | -0.01    | 0.48     | 0.13    | 0.05    | 0.10       | 0.14       | -0.03     | 0.65      | 0.11       | 0.12       | -0.13   | 0.05    |



|                              |         |       |      |       |      |       |      |       |      |       |      |       |      |
|------------------------------|---------|-------|------|-------|------|-------|------|-------|------|-------|------|-------|------|
| Akt_pS473                    | AKT1    | -0.39 | 0.03 | -0.12 | 0.59 | -0.26 | 0.12 | -0.14 | 0.54 | 0.14  | 0.34 | -0.28 | 0.26 |
| Akt_pT308                    | AKT1    | -0.12 | 0.16 | 0.03  | 0.77 | -0.10 | 0.44 | -0.14 | 0.40 | 0.02  | 0.91 | -0.15 | 0.28 |
| Ambra1_pS52                  | AMBRA1  | 0.16  | 0.27 | -0.07 | 0.45 | 0.08  | 0.22 | 0.15  | 0.17 | -0.08 | 0.54 | 0.23  | 0.16 |
| AMPK-a2_pS345                | PRKAA2  | -0.08 | 0.11 | 0.00  | 0.98 | -0.02 | 0.59 | -0.02 | 0.71 | 0.06  | 0.25 | -0.08 | 0.21 |
| AMPKa                        | PRKAA1  | -0.02 | 0.61 | 0.04  | 0.50 | -0.02 | 0.82 | -0.06 | 0.51 | 0.00  | 1.00 | -0.06 | 0.31 |
| AMPKa_pT172                  | PRKAA1  | -0.38 | 0.03 | -0.36 | 0.08 | -0.58 | 0.01 | -0.22 | 0.20 | -0.21 | 0.07 | -0.02 | 0.90 |
| Annexin-I                    | ANXA1   | 0.10  | 0.22 | -0.05 | 0.38 | 0.10  | 0.40 | 0.15  | 0.25 | 0.00  | 0.99 | 0.15  | 0.11 |
| Annexin-VII                  | ANXA7   | -0.01 | 0.94 | 0.06  | 0.69 | 0.15  | 0.46 | 0.09  | 0.57 | 0.17  | 0.39 | -0.07 | 0.54 |
| AR                           | AR      | -0.46 | 0.02 | 0.16  | 0.40 | -0.22 | 0.11 | -0.38 | 0.11 | 0.24  | 0.11 | -0.62 | 0.03 |
| ARID1A                       | ARID1A  | -0.60 | 0.01 | 0.01  | 0.90 | -0.49 | 0.01 | -0.50 | 0.01 | 0.11  | 0.40 | -0.61 | 0.01 |
| ASNS                         | ASNS    | -0.23 | 0.06 | -0.39 | 0.02 | -0.68 | 0.03 | -0.28 | 0.18 | -0.44 | 0.07 | 0.16  | 0.12 |
| Atg3                         | ATG3    | -0.10 | 0.26 | -0.14 | 0.20 | -0.19 | 0.09 | -0.06 | 0.56 | -0.09 | 0.29 | 0.04  | 0.67 |
| Atg4B                        | ATG4B   | -0.27 | 0.03 | -0.17 | 0.08 | -0.35 | 0.02 | -0.18 | 0.13 | -0.08 | 0.39 | -0.09 | 0.18 |
| Atg5                         | ATG5    | -0.05 | 0.49 | -0.05 | 0.52 | -0.11 | 0.22 | -0.06 | 0.47 | -0.06 | 0.39 | 0.00  | 0.95 |
| Atg7                         | ATG7    | 0.07  | 0.08 | -0.12 | 0.03 | 0.02  | 0.83 | 0.14  | 0.22 | -0.05 | 0.58 | 0.20  | 0.01 |
| ATM                          | ATM     | 0.29  | 0.08 | 0.16  | 0.41 | 0.36  | 0.20 | 0.21  | 0.44 | 0.08  | 0.74 | 0.13  | 0.45 |
| ATM_pS1981                   | ATM     | -0.07 | 0.22 | -0.06 | 0.50 | -0.07 | 0.21 | -0.01 | 0.93 | 0.00  | 1.00 | -0.01 | 0.93 |
| ATP5A                        | ATP5F1A | -0.11 | 0.11 | 0.00  | 0.95 | -0.12 | 0.09 | -0.12 | 0.05 | -0.01 | 0.79 | -0.10 | 0.06 |
| ATP5H                        | ATP5PD  | -0.07 | 0.21 | -0.06 | 0.35 | -0.09 | 0.13 | -0.03 | 0.63 | -0.02 | 0.51 | -0.01 | 0.89 |
| ATR                          | ATR     | -0.08 | 0.15 | -0.08 | 0.15 | -0.09 | 0.31 | -0.01 | 0.88 | -0.01 | 0.90 | 0.00  | 0.96 |
| ATRX                         | ATRX    | 0.62  | 0.02 | 0.33  | 0.09 | 0.71  | 0.02 | 0.38  | 0.10 | 0.09  | 0.65 | 0.29  | 0.14 |
| ATR_pS428                    | ATR     | 0.02  | 0.75 | 0.01  | 0.93 | -0.08 | 0.34 | -0.09 | 0.51 | -0.10 | 0.20 | 0.01  | 0.93 |
| Aurora-A                     | AURKA   | 0.01  | 0.83 | -0.09 | 0.41 | 0.11  | 0.30 | 0.19  | 0.17 | 0.10  | 0.35 | 0.10  | 0.37 |
| Aurora-ABC_pT288_pT232_pT198 | AURKA   | -0.11 | 0.47 | -0.01 | 0.96 | 0.03  | 0.89 | 0.04  | 0.85 | 0.14  | 0.53 | -0.10 | 0.45 |
| Aurora-B                     | AURKB   | 0.32  | 0.02 | 0.13  | 0.30 | 0.40  | 0.06 | 0.27  | 0.14 | 0.08  | 0.53 | 0.18  | 0.20 |
| Axl                          | AXL     | 0.03  | 0.66 | 0.08  | 0.49 | 0.06  | 0.47 | -0.01 | 0.93 | 0.03  | 0.74 | -0.04 | 0.70 |
| b-Actin                      | ACTB    | -0.07 | 0.16 | -0.08 | 0.27 | -0.10 | 0.03 | -0.02 | 0.74 | -0.04 | 0.31 | 0.02  | 0.80 |
| b-Catenin                    | CTNNB1  | 0.00  | 0.96 | 0.03  | 0.80 | 0.06  | 0.58 | 0.03  | 0.83 | 0.06  | 0.51 | -0.03 | 0.75 |
| b-Catenin_pT41_S45           | CTNNB1  | 0.11  | 0.30 | 0.13  | 0.25 | 0.02  | 0.92 | -0.11 | 0.49 | -0.09 | 0.56 | -0.02 | 0.79 |

|                      |         |       |      |       |      |       |      |       |      |       |      |       |      |
|----------------------|---------|-------|------|-------|------|-------|------|-------|------|-------|------|-------|------|
| B-Raf                | BRAF    | 0.00  | 0.96 | 0.18  | 0.30 | 0.16  | 0.06 | -0.02 | 0.89 | 0.16  | 0.10 | -0.18 | 0.29 |
| B-Raf_pS445          | BRAF    | -0.11 | 0.17 | -0.02 | 0.77 | -0.13 | 0.27 | -0.11 | 0.31 | -0.02 | 0.80 | -0.09 | 0.06 |
| B7-H3                | CD276   | 0.07  | 0.27 | 0.08  | 0.20 | -0.05 | 0.40 | -0.13 | 0.04 | -0.12 | 0.05 | -0.01 | 0.68 |
| B7-H4                | VTCN1   | -0.09 | 0.17 | 0.12  | 0.06 | 0.03  | 0.52 | -0.09 | 0.11 | 0.12  | 0.07 | -0.21 | 0.02 |
| Bad_pS112            | BAD     | 0.06  | 0.30 | -0.13 | 0.06 | -0.08 | 0.14 | 0.05  | 0.38 | -0.14 | 0.05 | 0.19  | 0.03 |
| Bak                  | BAK1    | 0.01  | 0.84 | 0.02  | 0.74 | -0.03 | 0.24 | -0.05 | 0.39 | -0.04 | 0.43 | -0.01 | 0.91 |
| BAP1                 | BAP1    | 0.05  | 0.67 | 0.15  | 0.23 | 0.07  | 0.54 | -0.08 | 0.26 | 0.02  | 0.87 | -0.10 | 0.35 |
| Bax                  | BAX     | 0.18  | 0.06 | -0.05 | 0.59 | 0.12  | 0.17 | 0.17  | 0.10 | -0.06 | 0.29 | 0.23  | 0.06 |
| Bcl-xL               | BCL2L1  | 0.11  | 0.03 | -0.05 | 0.14 | 0.01  | 0.83 | 0.05  | 0.10 | -0.10 | 0.03 | 0.15  | 0.00 |
| Bcl2                 | BCL2    | 0.00  | 0.97 | 0.06  | 0.34 | 0.02  | 0.65 | -0.03 | 0.41 | 0.03  | 0.54 | -0.06 | 0.24 |
| BCL2A1               | BCL2A1  | -0.10 | 0.33 | 0.04  | 0.55 | -0.03 | 0.78 | -0.07 | 0.50 | 0.07  | 0.58 | -0.14 | 0.17 |
| Beclin               | BECN1   | -0.08 | 0.02 | -0.08 | 0.10 | -0.09 | 0.32 | -0.01 | 0.90 | -0.01 | 0.94 | 0.00  | 0.91 |
| Bid                  | BID     | -0.09 | 0.26 | -0.13 | 0.17 | -0.17 | 0.10 | -0.04 | 0.64 | -0.08 | 0.28 | 0.04  | 0.52 |
| Bim                  | BCL2L11 | -0.11 | 0.38 | 0.32  | 0.04 | 0.32  | 0.30 | 0.00  | 0.99 | 0.43  | 0.20 | -0.43 | 0.03 |
| BiP-GRP78            | HSPA5   | -0.11 | 0.20 | -0.14 | 0.37 | -0.08 | 0.61 | 0.06  | 0.75 | 0.03  | 0.83 | 0.02  | 0.87 |
| BMK1-Erk5_pT218_Y220 | MAPK7   | -0.07 | 0.12 | -0.10 | 0.30 | -0.02 | 0.80 | 0.08  | 0.42 | 0.06  | 0.43 | 0.02  | 0.78 |
| BRCA1                | BRCA1   | -0.08 | 0.42 | 0.01  | 0.93 | -0.04 | 0.12 | -0.05 | 0.60 | 0.04  | 0.69 | -0.09 | 0.49 |
| BRD4                 | BRD4    | 0.28  | 0.40 | 0.21  | 0.54 | 0.27  | 0.41 | 0.06  | 0.75 | -0.01 | 0.94 | 0.07  | 0.74 |
| c-Abl                | ABL1    | -0.12 | 0.14 | 0.01  | 0.80 | -0.11 | 0.22 | -0.12 | 0.17 | 0.01  | 0.89 | -0.14 | 0.10 |
| c-Abl_pY412          | ABL1    | 0.01  | 0.94 | 0.04  | 0.54 | 0.01  | 0.94 | -0.03 | 0.68 | 0.00  | 0.99 | -0.04 | 0.55 |
| c-IAP2               | BIRC3   | 0.00  | 0.94 | 0.03  | 0.70 | -0.02 | 0.59 | -0.05 | 0.50 | -0.02 | 0.47 | -0.03 | 0.66 |
| c-Jun_pS73           | JUN     | 0.24  | 0.03 | 0.03  | 0.81 | 0.31  | 0.00 | 0.28  | 0.12 | 0.07  | 0.26 | 0.21  | 0.19 |
| c-Kit                | KIT     | -0.03 | 0.74 | -0.10 | 0.32 | -0.08 | 0.45 | 0.02  | 0.80 | -0.05 | 0.49 | 0.07  | 0.26 |
| c-Met_pY1234_Y1235   | MET     | 0.01  | 0.78 | 0.07  | 0.28 | 0.05  | 0.46 | -0.02 | 0.74 | 0.04  | 0.54 | -0.06 | 0.33 |
| c-Myc                | MYC     | -0.08 | 0.39 | -0.13 | 0.13 | -0.09 | 0.15 | 0.04  | 0.57 | -0.01 | 0.89 | 0.05  | 0.58 |
| C-Raf                | RAF1    | -0.06 | 0.35 | -0.01 | 0.80 | -0.02 | 0.77 | -0.01 | 0.89 | 0.05  | 0.52 | -0.05 | 0.40 |
| C-Raf_pS338          | RAF1    | -0.11 | 0.14 | -0.25 | 0.04 | -0.33 | 0.09 | -0.08 | 0.57 | -0.22 | 0.18 | 0.14  | 0.16 |
| CA9                  | CA9     | 0.09  | 0.28 | 0.16  | 0.05 | 0.18  | 0.13 | 0.03  | 0.78 | 0.09  | 0.41 | -0.06 | 0.40 |
| Calnexin             | CANX    | 0.54  | 0.02 | 0.12  | 0.35 | 0.61  | 0.03 | 0.49  | 0.06 | 0.07  | 0.65 | 0.42  | 0.01 |
| Caspase-3-cleaved    | CASP3   | 0.07  | 0.53 | 0.10  | 0.37 | 0.16  | 0.19 | 0.06  | 0.61 | 0.09  | 0.45 | -0.03 | 0.78 |

|                    |         |       |      |       |      |       |      |       |      |       |      |       |      |
|--------------------|---------|-------|------|-------|------|-------|------|-------|------|-------|------|-------|------|
| Caspase-7-cleaved- | CASP7   | 0.11  | 0.02 | -0.08 | 0.05 | 0.21  | 0.03 | 0.30  | 0.01 | 0.10  | 0.15 | 0.19  | 0.00 |
| Caspase-8-M-Q      | CASP8   | -0.01 | 0.89 | -0.13 | 0.19 | -0.14 | 0.17 | -0.01 | 0.65 | -0.13 | 0.03 | 0.12  | 0.04 |
| Caveolin-1         | CAV1    | -0.01 | 0.93 | 0.17  | 0.07 | 0.21  | 0.05 | 0.04  | 0.38 | 0.22  | 0.08 | -0.18 | 0.11 |
| CD134              | TNFRSF4 | -0.14 | 0.07 | -0.08 | 0.14 | -0.09 | 0.25 | -0.01 | 0.93 | 0.06  | 0.45 | -0.06 | 0.30 |
| CD171              | L1CAM   | 0.20  | 0.06 | 0.53  | 0.02 | 0.95  | 0.01 | 0.42  | 0.06 | 0.75  | 0.02 | -0.33 | 0.09 |
| CD20               | MS4A1   | -0.10 | 0.27 | -0.18 | 0.01 | -0.12 | 0.23 | 0.06  | 0.50 | -0.02 | 0.85 | 0.08  | 0.36 |
| CD26               | DPP4    | -0.01 | 0.61 | -0.03 | 0.25 | -0.08 | 0.44 | -0.05 | 0.61 | -0.07 | 0.50 | 0.02  | 0.43 |
| CD29               | ITGB1   | -0.10 | 0.35 | -0.08 | 0.24 | -0.06 | 0.40 | 0.02  | 0.77 | 0.04  | 0.70 | -0.02 | 0.86 |
| CD31               | PECAM1  | -0.07 | 0.26 | -0.29 | 0.16 | -0.16 | 0.05 | 0.13  | 0.45 | -0.09 | 0.08 | 0.22  | 0.25 |
| CD38               | CD38    | 0.09  | 0.44 | 0.13  | 0.27 | -0.02 | 0.88 | -0.15 | 0.30 | -0.11 | 0.43 | -0.04 | 0.53 |
| CD4                | CD4     | 0.03  | 0.45 | 0.12  | 0.10 | 0.09  | 0.34 | -0.03 | 0.75 | 0.06  | 0.51 | -0.09 | 0.17 |
| CD44               | CD44    | 0.06  | 0.61 | 0.00  | 0.99 | -0.07 | 0.53 | -0.07 | 0.47 | -0.13 | 0.16 | 0.06  | 0.57 |
| CD45               | PTPRC   | -0.12 | 0.05 | -0.08 | 0.03 | -0.09 | 0.25 | 0.00  | 0.94 | 0.03  | 0.63 | -0.04 | 0.37 |
| CD49b              | ITGA2   | -0.12 | 0.17 | -0.11 | 0.04 | -0.17 | 0.11 | -0.06 | 0.48 | -0.05 | 0.60 | -0.01 | 0.92 |
| CD5                | CD5     | 0.10  | 0.40 | 0.10  | 0.42 | 0.06  | 0.67 | -0.04 | 0.79 | -0.04 | 0.77 | 0.00  | 0.98 |
| CD68               | CD68    | -0.01 | 0.82 | 0.06  | 0.21 | 0.01  | 0.87 | -0.04 | 0.60 | 0.02  | 0.77 | -0.07 | 0.04 |
| cdc25C             | CDC25C  | 0.06  | 0.35 | -0.15 | 0.30 | -0.02 | 0.91 | 0.13  | 0.45 | -0.07 | 0.62 | 0.21  | 0.19 |
| cdc2_pY15          | CDK1    | 0.13  | 0.06 | -0.04 | 0.45 | 0.14  | 0.06 | 0.19  | 0.03 | 0.01  | 0.79 | 0.17  | 0.02 |
| Cdc42              | CDC42   | -0.08 | 0.23 | -0.04 | 0.52 | -0.08 | 0.20 | -0.04 | 0.38 | -0.01 | 0.85 | -0.04 | 0.42 |
| Cdc6               | CDC6    | 0.01  | 0.90 | 0.04  | 0.66 | 0.08  | 0.54 | 0.04  | 0.74 | 0.07  | 0.55 | -0.03 | 0.65 |
| CDK1_pT14          | CDK1    | -0.16 | 0.10 | -0.07 | 0.44 | -0.15 | 0.11 | -0.08 | 0.36 | 0.01  | 0.88 | -0.09 | 0.31 |
| CDKN2A             | CDKN2A  | 0.04  | 0.54 | 0.21  | 0.07 | 0.24  | 0.12 | 0.03  | 0.79 | 0.19  | 0.17 | -0.16 | 0.11 |
| CDT1               | CDT1    | 0.07  | 0.26 | 0.17  | 0.06 | 0.17  | 0.03 | 0.00  | 0.96 | 0.10  | 0.13 | -0.10 | 0.19 |
| CHD1L              | CHD1L   | 0.21  | 0.12 | 0.06  | 0.32 | 0.25  | 0.00 | 0.19  | 0.04 | 0.04  | 0.70 | 0.15  | 0.22 |
| Chk1               | CHEK1   | 0.14  | 0.03 | 0.04  | 0.37 | 0.19  | 0.05 | 0.15  | 0.09 | 0.05  | 0.50 | 0.10  | 0.07 |
| Chk1_pS296         | CHEK1   | -0.06 | 0.21 | -0.02 | 0.55 | -0.07 | 0.30 | -0.05 | 0.49 | -0.02 | 0.80 | -0.03 | 0.52 |
| Chk1_pS345         | CHEK1   | -0.02 | 0.53 | -0.03 | 0.63 | -0.03 | 0.47 | 0.00  | 0.97 | 0.00  | 0.90 | 0.01  | 0.92 |
| Chk2               | CHEK2   | 0.02  | 0.80 | -0.14 | 0.02 | -0.03 | 0.61 | 0.11  | 0.15 | -0.05 | 0.57 | 0.16  | 0.09 |
| Chk2_pT68          | CHEK2   | 0.14  | 0.16 | 0.12  | 0.19 | 0.10  | 0.32 | -0.02 | 0.73 | -0.04 | 0.57 | 0.02  | 0.62 |
| CIITA              | CIITA   | -0.04 | 0.31 | 0.03  | 0.45 | 0.02  | 0.68 | -0.01 | 0.91 | 0.06  | 0.29 | -0.07 | 0.07 |

|                    |        |       |      |       |      |       |      |       |      |       |      |       |      |
|--------------------|--------|-------|------|-------|------|-------|------|-------|------|-------|------|-------|------|
| Claudin-7          | CLDN7  | 0.31  | 0.07 | 0.18  | 0.21 | 0.39  | 0.13 | 0.21  | 0.33 | 0.09  | 0.67 | 0.13  | 0.19 |
| COG3               | COG3   | 0.15  | 0.27 | 0.10  | 0.52 | 0.08  | 0.52 | -0.03 | 0.84 | -0.07 | 0.33 | 0.05  | 0.73 |
| Collagen-VI        | COL6A1 | -0.15 | 0.20 | -0.09 | 0.48 | -0.16 | 0.15 | -0.07 | 0.58 | -0.02 | 0.88 | -0.06 | 0.66 |
| Complex-II-Subunit | SDHB   | 0.04  | 0.59 | -0.04 | 0.81 | 0.05  | 0.68 | 0.08  | 0.61 | 0.01  | 0.94 | 0.08  | 0.61 |
| Connexin-43        | GJA1   | -0.02 | 0.81 | -0.05 | 0.33 | -0.01 | 0.84 | 0.03  | 0.64 | 0.01  | 0.95 | 0.03  | 0.76 |
| Coup-TFII          | NR2F2  | -0.13 | 0.09 | 0.04  | 0.44 | 0.02  | 0.81 | -0.01 | 0.90 | 0.16  | 0.20 | -0.17 | 0.05 |
| Cox-IV             | COX4I1 | -0.34 | 0.07 | 0.04  | 0.82 | -0.25 | 0.57 | -0.28 | 0.53 | 0.09  | 0.84 | -0.37 | 0.09 |
| Cox2               | PTGS2  | 0.05  | 0.46 | 0.07  | 0.28 | 0.10  | 0.21 | 0.03  | 0.64 | 0.04  | 0.54 | -0.02 | 0.76 |
| CRABP2             | CRABP2 | -0.22 | 0.13 | -0.31 | 0.05 | -0.40 | 0.14 | -0.09 | 0.66 | -0.18 | 0.41 | 0.09  | 0.23 |
| Creb               | CREB1  | -0.03 | 0.60 | 0.04  | 0.33 | -0.02 | 0.73 | -0.06 | 0.33 | 0.01  | 0.89 | -0.07 | 0.25 |
| CREB_pS133         | CREB1  | -0.16 | 0.01 | 0.02  | 0.85 | -0.06 | 0.58 | -0.08 | 0.60 | 0.10  | 0.38 | -0.18 | 0.25 |
| CSK                | CSK    | 0.03  | 0.82 | 0.02  | 0.84 | 0.04  | 0.70 | 0.02  | 0.86 | 0.00  | 0.98 | 0.01  | 0.93 |
| CtIP               | RBBP8  | 0.43  | 0.05 | 0.34  | 0.03 | 0.67  | 0.00 | 0.32  | 0.04 | 0.24  | 0.18 | 0.09  | 0.59 |
| Cyclin-B1          | CCNB1  | 0.21  | 0.33 | -0.21 | 0.45 | 0.13  | 0.51 | 0.34  | 0.22 | -0.08 | 0.59 | 0.42  | 0.16 |
| Cyclin-D1          | CCND1  | 0.02  | 0.62 | 0.06  | 0.21 | 0.08  | 0.38 | 0.02  | 0.81 | 0.06  | 0.48 | -0.04 | 0.27 |
| Cyclin-D3          | CCND3  | -0.02 | 0.71 | -0.05 | 0.35 | -0.09 | 0.25 | -0.04 | 0.58 | -0.07 | 0.32 | 0.03  | 0.47 |
| Cyclin-E1          | CCNE1  | -0.09 | 0.08 | -0.07 | 0.40 | -0.06 | 0.28 | 0.02  | 0.84 | 0.04  | 0.48 | -0.02 | 0.80 |
| Cyclophilin-F      | PPIF   | -0.01 | 0.81 | -0.14 | 0.16 | -0.16 | 0.37 | -0.02 | 0.91 | -0.15 | 0.41 | 0.13  | 0.19 |
| D-a-Tubulin        | TUBA4A | -0.03 | 0.68 | -0.01 | 0.92 | -0.05 | 0.43 | -0.04 | 0.40 | -0.02 | 0.68 | -0.02 | 0.72 |
| DAPK2              | DAPK2  | -0.11 | 0.07 | -0.03 | 0.55 | -0.10 | 0.07 | -0.07 | 0.16 | 0.00  | 0.93 | -0.08 | 0.16 |
| DDB-1              | DDB1   | 0.29  | 0.19 | 0.19  | 0.29 | 0.23  | 0.00 | 0.04  | 0.79 | -0.05 | 0.76 | 0.09  | 0.67 |
| DDR1               | DDR1   | -0.04 | 0.65 | 0.12  | 0.29 | -0.05 | 0.49 | -0.17 | 0.15 | -0.01 | 0.91 | -0.16 | 0.19 |
| DDR1_pY513         | DDR1   | -0.04 | 0.50 | -0.24 | 0.02 | -0.28 | 0.01 | -0.04 | 0.56 | -0.24 | 0.02 | 0.20  | 0.03 |
| DJ1                | PARK7  | 0.06  | 0.49 | -0.09 | 0.14 | 0.05  | 0.63 | 0.14  | 0.22 | -0.01 | 0.91 | 0.16  | 0.15 |
| DM-K9-Histone-H3   | HC31   | -0.01 | 0.97 | 0.04  | 0.81 | 0.14  | 0.38 | 0.10  | 0.37 | 0.15  | 0.40 | -0.05 | 0.79 |
| DNA-Ligase-IV      | LIG4   | 0.00  | 0.96 | 0.08  | 0.25 | 0.02  | 0.81 | -0.06 | 0.46 | 0.02  | 0.80 | -0.08 | 0.28 |
| DNA_POLG           | POLG   | 0.06  | 0.43 | 0.15  | 0.07 | 0.20  | 0.05 | 0.05  | 0.49 | 0.14  | 0.14 | -0.09 | 0.22 |
| DNMT1              | DNMT1  | 0.24  | 0.22 | 0.06  | 0.74 | 0.22  | 0.24 | 0.15  | 0.28 | -0.03 | 0.80 | 0.18  | 0.26 |
| DRP1               | DNM1L  | 0.00  | 0.97 | -0.14 | 0.03 | -0.03 | 0.73 | 0.11  | 0.23 | -0.02 | 0.85 | 0.13  | 0.30 |
| DUSP4              | DUSP4  | 0.02  | 0.90 | -0.77 | 0.01 | -0.90 | 0.03 | -0.13 | 0.60 | -0.92 | 0.03 | 0.79  | 0.01 |

|             |        |       |      |       |      |       |      |       |      |       |      |       |      |
|-------------|--------|-------|------|-------|------|-------|------|-------|------|-------|------|-------|------|
| DUSP6       | DUSP6  | 0.32  | 0.03 | -0.25 | 0.06 | -0.29 | 0.10 | -0.03 | 0.80 | -0.60 | 0.02 | 0.57  | 0.01 |
| Dvl3        | DVL3   | 0.20  | 0.05 | 0.01  | 0.73 | 0.29  | 0.14 | 0.28  | 0.14 | 0.08  | 0.57 | 0.20  | 0.04 |
| E-Cadherin  | CDH1   | -0.02 | 0.78 | 0.24  | 0.18 | 0.33  | 0.11 | 0.10  | 0.61 | 0.35  | 0.10 | -0.26 | 0.15 |
| E2F1        | E2F1   | -0.05 | 0.09 | -0.05 | 0.40 | 0.03  | 0.59 | 0.08  | 0.29 | 0.08  | 0.21 | 0.00  | 0.99 |
| eEF2        | EEF2   | -0.20 | 0.15 | -0.14 | 0.09 | -0.25 | 0.01 | -0.11 | 0.15 | -0.05 | 0.66 | -0.06 | 0.60 |
| eEF2K       | EEF2K  | 0.10  | 0.17 | 0.10  | 0.00 | 0.19  | 0.06 | 0.08  | 0.25 | 0.08  | 0.32 | 0.00  | 1.00 |
| EGFR        | EGFR   | -0.03 | 0.75 | 0.49  | 0.01 | 0.38  | 0.02 | -0.11 | 0.38 | 0.41  | 0.02 | -0.52 | 0.01 |
| EGFR_pY1173 | EGFR   | 0.04  | 0.65 | -0.05 | 0.56 | -0.10 | 0.30 | -0.05 | 0.35 | -0.15 | 0.05 | 0.10  | 0.15 |
| eIF4E       | EIF4E  | 0.17  | 0.07 | -0.12 | 0.02 | 0.01  | 0.91 | 0.12  | 0.14 | -0.17 | 0.09 | 0.29  | 0.03 |
| eIF4E_pS209 | EIF4E  | 0.23  | 0.05 | -0.33 | 0.02 | 0.08  | 0.34 | 0.41  | 0.01 | -0.15 | 0.07 | 0.56  | 0.00 |
| eIF4G       | EIF4G1 | -0.31 | 0.05 | -0.08 | 0.47 | -0.33 | 0.05 | -0.25 | 0.04 | -0.02 | 0.77 | -0.23 | 0.04 |
| Elk1_pS383  | ELK1   | -0.01 | 0.84 | -0.01 | 0.85 | -0.03 | 0.59 | -0.02 | 0.64 | -0.02 | 0.72 | 0.00  | 0.98 |
| EMA         | MUC1   | 0.63  | 0.01 | 0.21  | 0.40 | 0.55  | 0.02 | 0.34  | 0.21 | -0.08 | 0.56 | 0.43  | 0.15 |
| Enolase-1   | ENO1   | -0.02 | 0.83 | 0.00  | 0.97 | 0.02  | 0.69 | 0.02  | 0.51 | 0.04  | 0.65 | -0.02 | 0.84 |
| Enolase-2   | ENO2   | 0.06  | 0.43 | 0.17  | 0.07 | 0.17  | 0.08 | -0.01 | 0.92 | 0.10  | 0.12 | -0.11 | 0.13 |
| ENY2        | ENY2   | 0.07  | 0.24 | -0.01 | 0.73 | 0.10  | 0.49 | 0.11  | 0.44 | 0.03  | 0.83 | 0.08  | 0.21 |
| EphA2       | EPHA2  | 0.09  | 0.12 | -0.12 | 0.27 | -0.07 | 0.25 | 0.05  | 0.60 | -0.15 | 0.04 | 0.20  | 0.10 |
| EphA2_pS897 | EPHA2  | -0.02 | 0.85 | -0.53 | 0.06 | -0.27 | 0.10 | 0.26  | 0.25 | -0.26 | 0.12 | 0.51  | 0.08 |
| EphA2_pY588 | EPHA2  | 0.08  | 0.18 | -0.36 | 0.01 | -0.32 | 0.00 | 0.05  | 0.50 | -0.40 | 0.00 | 0.44  | 0.00 |
| ER-a        | ESR1   | -0.24 | 0.04 | 0.27  | 0.01 | -0.04 | 0.48 | -0.31 | 0.01 | 0.20  | 0.07 | -0.51 | 0.00 |
| ER-a_pS118  | ESR1   | -0.03 | 0.89 | 0.04  | 0.80 | 0.23  | 0.20 | 0.19  | 0.17 | 0.25  | 0.19 | -0.07 | 0.70 |
| ERCC1       | ERCC1  | -0.08 | 0.16 | 0.04  | 0.55 | 0.00  | 0.97 | -0.04 | 0.60 | 0.08  | 0.18 | -0.12 | 0.15 |
| ERCC5       | ERCC5  | 0.30  | 0.01 | 0.12  | 0.07 | 0.24  | 0.10 | 0.12  | 0.30 | -0.06 | 0.55 | 0.18  | 0.01 |
| Erk5        | MAPK7  | 0.22  | 0.05 | 0.10  | 0.18 | 0.25  | 0.03 | 0.15  | 0.11 | 0.02  | 0.80 | 0.13  | 0.18 |
| ERRalpha    | ESRRA  | -0.06 | 0.39 | 0.06  | 0.33 | 0.00  | 0.98 | -0.06 | 0.44 | 0.06  | 0.49 | -0.12 | 0.13 |
| Ets-1       | ETS1   | -0.05 | 0.55 | -0.11 | 0.18 | -0.07 | 0.43 | 0.04  | 0.67 | -0.02 | 0.79 | 0.06  | 0.44 |
| EVI1        | MECOM  | 0.02  | 0.84 | 0.02  | 0.86 | -0.05 | 0.70 | -0.06 | 0.59 | -0.07 | 0.57 | 0.00  | 0.96 |
| FABP5       | FABP5  | -0.06 | 0.15 | -0.06 | 0.29 | -0.03 | 0.64 | 0.03  | 0.70 | 0.03  | 0.69 | 0.00  | 0.96 |
| FAK         | PTK2   | -0.07 | 0.29 | 0.04  | 0.66 | -0.09 | 0.40 | -0.13 | 0.29 | -0.02 | 0.82 | -0.11 | 0.27 |
| FAK_pY397   | PTK2   | -0.58 | 0.01 | -0.18 | 0.01 | -0.54 | 0.04 | -0.37 | 0.08 | 0.04  | 0.78 | -0.40 | 0.01 |

|                   |           |       |      |       |      |       |      |       |      |       |      |       |      |
|-------------------|-----------|-------|------|-------|------|-------|------|-------|------|-------|------|-------|------|
| FASN              | FASN      | -0.02 | 0.88 | 0.08  | 0.39 | 0.00  | 0.99 | -0.08 | 0.45 | 0.02  | 0.88 | -0.11 | 0.49 |
| FGF-basic         | FGF2      | -0.15 | 0.33 | 0.06  | 0.69 | -0.08 | 0.64 | -0.14 | 0.37 | 0.07  | 0.58 | -0.21 | 0.14 |
| Fibronectin       | FN1       | 0.06  | 0.53 | 0.20  | 0.13 | 0.22  | 0.10 | 0.02  | 0.77 | 0.15  | 0.07 | -0.13 | 0.05 |
| FN14              | TNFRSF12A | -0.19 | 0.02 | 0.16  | 0.06 | 0.00  | 0.99 | -0.16 | 0.35 | 0.19  | 0.29 | -0.35 | 0.02 |
| FOXM1             | FOXM1     | 0.21  | 0.08 | -0.05 | 0.68 | 0.16  | 0.19 | 0.20  | 0.16 | -0.05 | 0.66 | 0.25  | 0.08 |
| FOXO3             | FOXO3     | -0.43 | 0.09 | 0.19  | 0.45 | -0.08 | 0.77 | -0.27 | 0.41 | 0.35  | 0.26 | -0.62 | 0.07 |
| FoxO3a_pS318_S321 | FOXO3     | -0.09 | 0.11 | -0.15 | 0.03 | -0.07 | 0.31 | 0.08  | 0.25 | 0.02  | 0.76 | 0.06  | 0.27 |
| FRS2-alpha_pY196  | FRS2      | 0.13  | 0.33 | -0.37 | 0.01 | -0.34 | 0.00 | 0.03  | 0.66 | -0.47 | 0.04 | 0.50  | 0.03 |
| G6PD              | G6PD      | 0.01  | 0.93 | 0.00  | 0.96 | -0.03 | 0.77 | -0.03 | 0.67 | -0.04 | 0.75 | 0.01  | 0.95 |
| Gab2              | GAB2      | 0.14  | 0.24 | 0.09  | 0.23 | 0.36  | 0.00 | 0.27  | 0.01 | 0.22  | 0.11 | 0.05  | 0.65 |
| GAPDH             | GAPDH     | -0.06 | 0.50 | -0.10 | 0.17 | -0.17 | 0.07 | -0.07 | 0.10 | -0.11 | 0.24 | 0.04  | 0.62 |
| GATA3             | GATA3     | -0.08 | 0.36 | 0.11  | 0.25 | 0.16  | 0.16 | 0.04  | 0.63 | 0.24  | 0.05 | -0.19 | 0.05 |
| GATA6             | GATA6     | 0.01  | 0.88 | 0.07  | 0.42 | 0.06  | 0.48 | -0.01 | 0.76 | 0.04  | 0.44 | -0.06 | 0.40 |
| GCLC              | GCLC      | -0.13 | 0.09 | 0.02  | 0.89 | -0.14 | 0.20 | -0.16 | 0.28 | -0.01 | 0.91 | -0.15 | 0.27 |
| GCLM              | GCLM      | -0.15 | 0.15 | -0.24 | 0.16 | -0.15 | 0.09 | 0.08  | 0.54 | 0.00  | 0.99 | 0.08  | 0.56 |
| GCN5L2            | KAT2A     | -0.25 | 0.30 | -0.16 | 0.55 | -0.18 | 0.29 | -0.01 | 0.96 | 0.08  | 0.69 | -0.09 | 0.75 |
| GGPS1             | GGPS1     | -0.03 | 0.61 | 0.07  | 0.61 | 0.02  | 0.47 | -0.05 | 0.73 | 0.05  | 0.36 | -0.10 | 0.50 |
| Gli1              | GLI1      | 0.03  | 0.55 | 0.04  | 0.68 | -0.02 | 0.74 | -0.06 | 0.57 | -0.05 | 0.46 | -0.01 | 0.93 |
| Gli3              | GLI3      | 0.00  | 0.98 | -0.09 | 0.10 | -0.05 | 0.55 | 0.04  | 0.65 | -0.05 | 0.65 | 0.09  | 0.38 |
| Glutamate-D1-2    | GLUD1     | 0.05  | 0.79 | 0.18  | 0.38 | 0.19  | 0.24 | 0.01  | 0.94 | 0.14  | 0.48 | -0.12 | 0.58 |
| Glutaminase       | GLS       | 0.10  | 0.06 | -0.04 | 0.60 | 0.01  | 0.66 | 0.05  | 0.48 | -0.09 | 0.10 | 0.14  | 0.13 |
| Granzyme-B        | GZMB      | -0.02 | 0.88 | -0.07 | 0.54 | 0.06  | 0.37 | 0.13  | 0.27 | 0.08  | 0.51 | 0.05  | 0.72 |
| GRB7              | GRB7      | 0.35  | 0.03 | -0.07 | 0.67 | 0.41  | 0.04 | 0.48  | 0.07 | 0.05  | 0.47 | 0.43  | 0.06 |
| Grp75             | HSPA9     | 0.08  | 0.52 | 0.04  | 0.69 | 0.04  | 0.68 | 0.01  | 0.93 | -0.04 | 0.74 | 0.05  | 0.67 |
| GSK-3a-b          | GSK3A     | -0.19 | 0.01 | -0.07 | 0.21 | -0.15 | 0.00 | -0.08 | 0.17 | 0.04  | 0.31 | -0.12 | 0.08 |
| GSK-3a-b_pS21_S9  | GSK3A     | -0.20 | 0.01 | 0.04  | 0.79 | -0.10 | 0.56 | -0.14 | 0.52 | 0.10  | 0.55 | -0.24 | 0.21 |
| GSK-3B            | GSK3B     | -0.45 | 0.00 | -0.12 | 0.12 | -0.40 | 0.00 | -0.27 | 0.02 | 0.05  | 0.15 | -0.33 | 0.01 |
| Gys               | GYS1      | -0.18 | 0.15 | -0.18 | 0.01 | -0.44 | 0.02 | -0.25 | 0.08 | -0.25 | 0.09 | 0.00  | 0.99 |
| Gys_pS641         | GYS1      | -0.28 | 0.01 | -0.12 | 0.08 | -0.36 | 0.00 | -0.24 | 0.01 | -0.08 | 0.12 | -0.16 | 0.03 |
| H2AX_pS139        | H2AX      | 0.36  | 0.00 | -0.01 | 0.93 | 0.54  | 0.01 | 0.55  | 0.01 | 0.18  | 0.14 | 0.37  | 0.04 |

|                    |          |       |      |       |      |       |      |       |      |       |      |       |      |
|--------------------|----------|-------|------|-------|------|-------|------|-------|------|-------|------|-------|------|
| H2AX_pS140         | H2AX     | 0.13  | 0.26 | 0.18  | 0.05 | 0.47  | 0.00 | 0.29  | 0.02 | 0.34  | 0.05 | -0.04 | 0.68 |
| HER2               | ERBB2    | 0.32  | 0.54 | 1.22  | 0.10 | 0.90  | 0.16 | -0.32 | 0.36 | 0.58  | 0.15 | -0.90 | 0.01 |
| HER2_pY1248        | ERBB2    | 0.27  | 0.22 | -0.18 | 0.15 | -0.30 | 0.06 | -0.12 | 0.24 | -0.57 | 0.05 | 0.45  | 0.10 |
| HER3               | ERBB3    | -0.78 | 0.01 | 0.22  | 0.01 | -0.51 | 0.02 | -0.72 | 0.01 | 0.28  | 0.08 | -1.00 | 0.00 |
| HER3_pY1289        | ERBB3    | -0.33 | 0.01 | -0.14 | 0.25 | -0.46 | 0.01 | -0.33 | 0.04 | -0.13 | 0.17 | -0.19 | 0.13 |
| Heregulin          | NRG1     | 0.12  | 0.14 | -0.11 | 0.24 | 0.05  | 0.70 | 0.17  | 0.32 | -0.06 | 0.67 | 0.23  | 0.06 |
| HES1               | HES1     | -0.28 | 0.07 | -0.04 | 0.75 | -0.32 | 0.11 | -0.29 | 0.15 | -0.04 | 0.81 | -0.25 | 0.12 |
| Hexokinase-I       | HK1      | -0.21 | 0.03 | 0.10  | 0.21 | -0.14 | 0.15 | -0.25 | 0.04 | 0.06  | 0.48 | -0.31 | 0.01 |
| Hexokinase-II      | HK2      | -0.11 | 0.38 | 0.10  | 0.40 | -0.02 | 0.82 | -0.13 | 0.06 | 0.08  | 0.04 | -0.21 | 0.02 |
| Hif-1-alpha        | HIF1A    | -0.14 | 0.08 | 0.10  | 0.29 | -0.12 | 0.27 | -0.21 | 0.09 | 0.03  | 0.76 | -0.24 | 0.04 |
| Histone-H3         | H3C1     | 0.49  | 0.01 | -0.21 | 0.18 | 0.68  | 0.02 | 0.88  | 0.01 | 0.18  | 0.33 | 0.70  | 0.01 |
| Histone-H3_pS10    | H3C1     | 0.17  | 0.07 | 0.11  | 0.21 | 0.23  | 0.18 | 0.12  | 0.42 | 0.06  | 0.68 | 0.06  | 0.38 |
| HLA-DQA1           | HLA-DQA1 | -0.02 | 0.67 | -0.03 | 0.56 | -0.06 | 0.25 | -0.03 | 0.59 | -0.03 | 0.61 | 0.00  | 0.97 |
| HLA-DR-DP-DQ-DX    | HLA-DRA  | 0.09  | 0.24 | 0.13  | 0.11 | 0.21  | 0.13 | 0.08  | 0.46 | 0.11  | 0.34 | -0.03 | 0.68 |
| HMHA1              | ARHGAP45 | 0.01  | 0.93 | 0.18  | 0.17 | 0.29  | 0.09 | 0.12  | 0.35 | 0.28  | 0.10 | -0.17 | 0.19 |
| HNRNPK             | HNRNPK   | 0.03  | 0.88 | 0.05  | 0.78 | 0.06  | 0.67 | 0.01  | 0.96 | 0.03  | 0.85 | -0.02 | 0.91 |
| HSP27              | HSBP1    | -0.10 | 0.26 | -0.01 | 0.82 | -0.03 | 0.70 | -0.02 | 0.82 | 0.07  | 0.52 | -0.09 | 0.32 |
| HSP27_pS82         | HSBP1    | 0.03  | 0.72 | 0.09  | 0.58 | 0.04  | 0.80 | -0.05 | 0.77 | 0.01  | 0.95 | -0.06 | 0.68 |
| HSP60              | HSPD1    | 0.20  | 0.07 | -0.18 | 0.32 | 0.09  | 0.30 | 0.27  | 0.17 | -0.11 | 0.10 | 0.38  | 0.10 |
| HSP70              | HSPA1A   | 0.23  | 0.05 | -0.08 | 0.49 | 0.09  | 0.37 | 0.17  | 0.23 | -0.14 | 0.25 | 0.30  | 0.06 |
| IDO                | IDO1     | 0.03  | 0.57 | 0.09  | 0.13 | 0.13  | 0.20 | 0.04  | 0.64 | 0.10  | 0.29 | -0.06 | 0.35 |
| IGF1R_pY1135_Y1136 | IGF1R    | 0.22  | 0.16 | 0.14  | 0.33 | 0.16  | 0.19 | 0.03  | 0.81 | -0.06 | 0.60 | 0.08  | 0.55 |
| IGFBP2             | IGFBP2   | 0.16  | 0.20 | 0.20  | 0.15 | 0.10  | 0.37 | -0.11 | 0.35 | -0.06 | 0.52 | -0.05 | 0.69 |
| IGFBP3             | IGFBP3   | -0.02 | 0.88 | -0.01 | 0.89 | 0.04  | 0.66 | 0.05  | 0.49 | 0.06  | 0.61 | 0.00  | 0.97 |
| IGFRb              | IGF1R    | -0.08 | 0.51 | 0.12  | 0.34 | 0.08  | 0.33 | -0.03 | 0.74 | 0.16  | 0.18 | -0.19 | 0.18 |
| IL-6               | IL6      | -0.01 | 0.79 | 0.14  | 0.07 | 0.13  | 0.23 | -0.01 | 0.91 | 0.14  | 0.21 | -0.15 | 0.00 |
| INPP4b             | INPP4B   | -0.02 | 0.84 | 0.06  | 0.59 | 0.27  | 0.07 | 0.22  | 0.07 | 0.30  | 0.03 | -0.08 | 0.34 |
| IR-b               | INSR     | 0.47  | 0.03 | -0.23 | 0.44 | 0.35  | 0.06 | 0.58  | 0.13 | -0.12 | 0.29 | 0.70  | 0.08 |
| IRF-1              | IRF1     | -0.05 | 0.57 | -0.09 | 0.18 | 0.02  | 0.85 | 0.10  | 0.30 | 0.06  | 0.56 | 0.04  | 0.65 |
| IRF-3              | IRF3     | -0.04 | 0.59 | -0.10 | 0.48 | 0.04  | 0.78 | 0.14  | 0.42 | 0.08  | 0.54 | 0.06  | 0.65 |

|                  |          |       |      |       |      |       |      |       |      |       |      |       |      |
|------------------|----------|-------|------|-------|------|-------|------|-------|------|-------|------|-------|------|
| IRS1             | IRS1     | 0.02  | 0.51 | 0.03  | 0.54 | 0.12  | 0.16 | 0.09  | 0.25 | 0.10  | 0.20 | -0.01 | 0.84 |
| IRS2             | IRS2     | 0.16  | 0.01 | 0.15  | 0.06 | 0.16  | 0.04 | 0.01  | 0.86 | 0.00  | 0.93 | 0.01  | 0.90 |
| JAB1             | COPS5    | -0.02 | 0.48 | 0.00  | 0.99 | -0.03 | 0.32 | -0.03 | 0.75 | -0.01 | 0.70 | -0.02 | 0.83 |
| Jagged1          | JAG1     | -0.07 | 0.35 | -0.03 | 0.21 | -0.05 | 0.51 | -0.02 | 0.78 | 0.02  | 0.84 | -0.04 | 0.57 |
| Jak2             | JAK2     | 0.09  | 0.15 | 0.15  | 0.04 | 0.17  | 0.08 | 0.02  | 0.77 | 0.08  | 0.34 | -0.06 | 0.28 |
| JNK2             | MAPK9    | -0.26 | 0.47 | -0.18 | 0.68 | -0.37 | 0.31 | -0.19 | 0.61 | -0.11 | 0.63 | -0.08 | 0.83 |
| JNK_pT183_Y185   | MAPK8    | 0.20  | 0.07 | 0.17  | 0.19 | 0.22  | 0.17 | 0.04  | 0.77 | 0.02  | 0.87 | 0.02  | 0.85 |
| KAP1             | TRIM28   | 0.13  | 0.39 | 0.19  | 0.40 | 0.24  | 0.23 | 0.05  | 0.81 | 0.10  | 0.51 | -0.05 | 0.79 |
| LAD1             | LAD1     | 0.02  | 0.91 | 0.08  | 0.26 | -0.01 | 0.94 | -0.09 | 0.29 | -0.02 | 0.88 | -0.07 | 0.61 |
| Lasu1            | HUWE1    | -0.04 | 0.42 | -0.10 | 0.07 | -0.03 | 0.77 | 0.07  | 0.52 | 0.01  | 0.96 | 0.07  | 0.17 |
| LC3A-B           | MAP1LC3A | -0.18 | 0.06 | 0.05  | 0.66 | -0.25 | 0.02 | -0.30 | 0.06 | -0.07 | 0.38 | -0.23 | 0.11 |
| Lck              | LCK      | 0.03  | 0.50 | 0.08  | 0.43 | 0.04  | 0.54 | -0.04 | 0.73 | 0.01  | 0.85 | -0.05 | 0.62 |
| LDHA             | LDHA     | -0.06 | 0.32 | -0.08 | 0.18 | -0.09 | 0.19 | -0.01 | 0.86 | -0.03 | 0.59 | 0.02  | 0.66 |
| LRP6_pS1490      | LRP6     | -0.16 | 0.04 | -0.09 | 0.14 | -0.27 | 0.01 | -0.18 | 0.03 | -0.10 | 0.14 | -0.08 | 0.19 |
| Lyn              | LYN      | -0.25 | 0.09 | -0.13 | 0.33 | -0.19 | 0.13 | -0.06 | 0.63 | 0.05  | 0.67 | -0.12 | 0.42 |
| MAPK_pT202_Y204  | MAPK1    | -0.20 | 0.69 | -0.13 | 0.80 | -0.30 | 0.54 | -0.18 | 0.39 | -0.10 | 0.67 | -0.07 | 0.80 |
| Mcl-1            | MCL1     | -0.40 | 0.05 | 0.17  | 0.09 | -0.22 | 0.06 | -0.39 | 0.01 | 0.18  | 0.25 | -0.57 | 0.02 |
| MCT4             | SLC16A3  | -0.11 | 0.34 | -0.16 | 0.19 | -0.48 | 0.03 | -0.32 | 0.09 | -0.37 | 0.06 | 0.05  | 0.69 |
| MDM2_pS166       | MDM2     | -0.05 | 0.38 | -0.04 | 0.67 | 0.02  | 0.87 | 0.06  | 0.65 | 0.07  | 0.54 | -0.01 | 0.86 |
| MEK1             | MAP2K1   | 0.01  | 0.97 | -0.18 | 0.47 | 0.02  | 0.92 | 0.19  | 0.46 | 0.01  | 0.96 | 0.18  | 0.48 |
| MEK1_p_S217_S221 | MAP2K1   | -0.02 | 0.38 | -0.03 | 0.52 | -0.03 | 0.67 | 0.00  | 0.99 | -0.01 | 0.93 | 0.01  | 0.87 |
| MEK2             | MAP2K2   | -0.06 | 0.15 | -0.06 | 0.47 | -0.10 | 0.06 | -0.04 | 0.62 | -0.04 | 0.24 | 0.00  | 0.97 |
| MelanA           | MLANA    | 0.00  | 0.96 | 0.11  | 0.20 | 0.09  | 0.43 | -0.02 | 0.83 | 0.09  | 0.38 | -0.11 | 0.04 |
| Melanoma-gp100   | PMEL     | 0.00  | 0.92 | 0.13  | 0.05 | 0.13  | 0.24 | 0.00  | 0.98 | 0.13  | 0.25 | -0.13 | 0.02 |
| MERIT40          | BABAM1   | 0.14  | 0.19 | -0.07 | 0.02 | 0.09  | 0.14 | 0.16  | 0.05 | -0.05 | 0.57 | 0.21  | 0.10 |
| MERIT40_pS29     | BABAM1   | -0.28 | 0.06 | -0.11 | 0.25 | -0.39 | 0.01 | -0.28 | 0.02 | -0.11 | 0.36 | -0.17 | 0.16 |
| Merlin           | NF2      | -0.05 | 0.56 | 0.03  | 0.72 | -0.02 | 0.88 | -0.06 | 0.71 | 0.03  | 0.85 | -0.08 | 0.33 |
| MIF              | MIF      | -0.05 | 0.27 | -0.18 | 0.10 | -0.05 | 0.68 | 0.13  | 0.35 | 0.00  | 0.99 | 0.13  | 0.20 |
| MIG6             | ERRF1    | 0.03  | 0.70 | -0.05 | 0.43 | 0.02  | 0.78 | 0.07  | 0.44 | 0.00  | 0.98 | 0.07  | 0.32 |
| MITF             | MITF     | 0.02  | 0.70 | 0.10  | 0.28 | 0.06  | 0.62 | -0.04 | 0.75 | 0.05  | 0.70 | -0.09 | 0.34 |



|                   |        |       |      |       |      |       |      |       |      |       |      |       |      |
|-------------------|--------|-------|------|-------|------|-------|------|-------|------|-------|------|-------|------|
| Mitofusin-1       | MFN1   | -0.11 | 0.35 | -0.05 | 0.55 | -0.13 | 0.14 | -0.08 | 0.32 | -0.02 | 0.81 | -0.05 | 0.63 |
| Mitofusin-2       | MFN2   | -0.02 | 0.92 | 0.11  | 0.51 | 0.05  | 0.80 | -0.07 | 0.60 | 0.06  | 0.67 | -0.13 | 0.34 |
| MLH1              | MLH1   | 0.06  | 0.54 | 0.11  | 0.49 | 0.29  | 0.08 | 0.18  | 0.32 | 0.23  | 0.14 | -0.05 | 0.77 |
| MLKL              | MLKL   | -0.10 | 0.19 | -0.01 | 0.78 | -0.09 | 0.66 | -0.08 | 0.69 | 0.01  | 0.97 | -0.09 | 0.23 |
| MMP14             | MMP14  | -0.01 | 0.92 | 0.13  | 0.04 | 0.21  | 0.13 | 0.08  | 0.45 | 0.22  | 0.19 | -0.14 | 0.33 |
| MMP2              | MMP2   | 0.12  | 0.27 | 0.02  | 0.88 | 0.03  | 0.84 | 0.01  | 0.95 | -0.09 | 0.48 | 0.10  | 0.36 |
| Mnk1              | MKKN1  | 0.12  | 0.16 | 0.06  | 0.25 | 0.21  | 0.06 | 0.15  | 0.13 | 0.09  | 0.34 | 0.06  | 0.38 |
| MR1               | MR1    | 0.01  | 0.95 | 0.02  | 0.91 | -0.01 | 0.98 | -0.03 | 0.91 | -0.02 | 0.94 | -0.01 | 0.98 |
| MRAP              | MRAP   | -0.05 | 0.59 | 0.04  | 0.71 | -0.04 | 0.33 | -0.08 | 0.47 | 0.01  | 0.94 | -0.09 | 0.49 |
| MSH2              | MSH2   | 0.26  | 0.10 | 0.13  | 0.29 | 0.33  | 0.01 | 0.20  | 0.15 | 0.07  | 0.55 | 0.13  | 0.39 |
| MSH6              | MSH6   | 0.20  | 0.31 | 0.07  | 0.24 | 0.25  | 0.15 | 0.18  | 0.24 | 0.04  | 0.83 | 0.13  | 0.47 |
| MSI2              | MSI2   | 0.41  | 0.01 | -0.01 | 0.94 | 0.44  | 0.01 | 0.45  | 0.03 | 0.03  | 0.78 | 0.42  | 0.04 |
| MTCO1             | MT-CO1 | -0.31 | 0.34 | -0.09 | 0.65 | -0.09 | 0.83 | 0.00  | 1.00 | 0.22  | 0.62 | -0.22 | 0.49 |
| mTOR              | MTOR   | -0.20 | 0.16 | 0.01  | 0.87 | -0.15 | 0.13 | -0.17 | 0.17 | 0.05  | 0.70 | -0.21 | 0.15 |
| mTOR_pS2448       | MTOR   | -0.47 | 0.01 | -0.06 | 0.42 | -0.56 | 0.03 | -0.50 | 0.03 | -0.09 | 0.56 | -0.41 | 0.01 |
| MTSS1             | MTSS1  | 0.07  | 0.13 | 0.06  | 0.48 | 0.04  | 0.59 | -0.02 | 0.86 | -0.03 | 0.73 | 0.01  | 0.91 |
| MYH11             | MYH11  | -0.01 | 0.79 | 0.07  | 0.28 | 0.04  | 0.58 | -0.03 | 0.66 | 0.06  | 0.39 | -0.08 | 0.04 |
| Myosin-IIa        | MYH9   | -0.11 | 0.08 | -0.05 | 0.45 | -0.03 | 0.70 | 0.01  | 0.86 | 0.08  | 0.35 | -0.06 | 0.26 |
| Myosin-IIa_pS1943 | MYH9   | -0.04 | 0.72 | -0.03 | 0.77 | 0.06  | 0.56 | 0.09  | 0.40 | 0.10  | 0.41 | -0.01 | 0.91 |
| Myt1              | PKMYT1 | 0.30  | 0.00 | -0.04 | 0.63 | 0.10  | 0.14 | 0.14  | 0.17 | -0.20 | 0.03 | 0.34  | 0.03 |
| N-Cadherin        | CDH2   | 0.01  | 0.93 | 0.13  | 0.13 | 0.11  | 0.35 | -0.02 | 0.81 | 0.10  | 0.34 | -0.12 | 0.05 |
| N-Ras             | NRAS   | -0.12 | 0.05 | -0.12 | 0.03 | -0.13 | 0.20 | 0.00  | 0.96 | 0.00  | 0.98 | 0.00  | 0.98 |
| NAPSIN-A          | NAPSA  | -0.03 | 0.62 | -0.02 | 0.72 | -0.08 | 0.30 | -0.06 | 0.43 | -0.05 | 0.51 | -0.01 | 0.88 |
| NDRG1_pT346       | NDRG1  | -0.45 | 0.04 | -0.05 | 0.80 | -0.42 | 0.07 | -0.37 | 0.17 | 0.03  | 0.86 | -0.40 | 0.13 |
| NDUFB4            | NDUFB4 | -0.12 | 0.12 | -0.11 | 0.20 | -0.17 | 0.01 | -0.06 | 0.44 | -0.05 | 0.44 | -0.01 | 0.92 |
| NF-kB-p65_pS536   | RELA   | -0.04 | 0.55 | -0.12 | 0.49 | -0.16 | 0.16 | -0.04 | 0.82 | -0.12 | 0.28 | 0.08  | 0.65 |
| Notch1            | NOTCH1 | 0.07  | 0.41 | 0.02  | 0.79 | 0.06  | 0.54 | 0.03  | 0.71 | -0.01 | 0.89 | 0.04  | 0.56 |
| Notch1-cleaved    | NOTCH1 | 0.11  | 0.52 | 0.35  | 0.04 | 0.17  | 0.19 | -0.18 | 0.08 | 0.05  | 0.73 | -0.23 | 0.21 |
| Notch3            | NOTCH3 | -0.06 | 0.12 | 0.05  | 0.19 | -0.06 | 0.55 | -0.11 | 0.31 | 0.01  | 0.95 | -0.11 | 0.02 |
| NQO1              | NQO1   | -0.13 | 0.11 | 0.05  | 0.55 | -0.11 | 0.17 | -0.17 | 0.11 | 0.01  | 0.86 | -0.18 | 0.09 |

|                      |                    |       |      |       |      |       |      |       |      |       |      |       |      |
|----------------------|--------------------|-------|------|-------|------|-------|------|-------|------|-------|------|-------|------|
| NRF2                 | NFE2L2             | -0.09 | 0.11 | -0.06 | 0.37 | -0.11 | 0.09 | -0.05 | 0.41 | -0.01 | 0.77 | -0.04 | 0.53 |
| Oct-4                | POU5F1             | -0.03 | 0.48 | 0.00  | 0.97 | -0.05 | 0.26 | -0.05 | 0.44 | -0.02 | 0.56 | -0.03 | 0.64 |
| P-Cadherin           | CDH3               | -0.03 | 0.44 | 0.06  | 0.42 | 0.04  | 0.28 | -0.02 | 0.75 | 0.07  | 0.17 | -0.09 | 0.26 |
| p21                  | CDKN1A             | 0.18  | 0.16 | 0.28  | 0.07 | 0.20  | 0.02 | -0.08 | 0.43 | 0.02  | 0.85 | -0.10 | 0.44 |
| p27-Kip1             | CDKN1B             | 0.00  | 1.00 | -0.04 | 0.47 | -0.04 | 0.43 | -0.01 | 0.87 | -0.04 | 0.55 | 0.04  | 0.60 |
| p27_pT157            | CDKN1B             | -0.02 | 0.92 | -0.05 | 0.75 | -0.12 | 0.68 | -0.07 | 0.80 | -0.10 | 0.70 | 0.04  | 0.47 |
| p27_pT198            | CDKN1B             | -0.24 | 0.09 | -0.04 | 0.74 | -0.24 | 0.17 | -0.20 | 0.21 | 0.00  | 0.99 | -0.20 | 0.09 |
| p38-a                | MAPK14             | -0.01 | 0.85 | 0.01  | 0.86 | -0.01 | 0.94 | -0.02 | 0.84 | 0.01  | 0.95 | -0.02 | 0.66 |
| p38-MAPK             | MAPK11             | -0.04 | 0.56 | -0.10 | 0.41 | -0.02 | 0.74 | 0.08  | 0.51 | 0.02  | 0.77 | 0.06  | 0.65 |
| p38-MAPK- pT180_Y182 | MAPK11             | 0.05  | 0.27 | 0.13  | 0.15 | 0.05  | 0.57 | -0.07 | 0.48 | 0.00  | 0.99 | -0.07 | 0.34 |
| p44-42-MAPK          | MAPK1              | 0.07  | 0.46 | -0.08 | 0.09 | 0.06  | 0.50 | 0.14  | 0.17 | -0.01 | 0.91 | 0.15  | 0.18 |
| p53                  | TP53               | 0.06  | 0.19 | 0.06  | 0.34 | 0.00  | 0.99 | -0.06 | 0.37 | -0.06 | 0.26 | 0.00  | 0.97 |
| p70-S6K1             | RPS6KB1            | -0.10 | 0.22 | -0.06 | 0.40 | -0.20 | 0.11 | -0.13 | 0.23 | -0.10 | 0.34 | -0.03 | 0.62 |
| p70-S6K_pT389        | RPS6KB1            | -0.26 | 0.15 | -0.06 | 0.70 | -0.14 | 0.33 | -0.08 | 0.41 | 0.11  | 0.32 | -0.20 | 0.17 |
| p90RSK_pT573         | RPS6KA1            | 0.29  | 0.11 | -0.11 | 0.44 | 0.19  | 0.24 | 0.30  | 0.05 | -0.09 | 0.47 | 0.40  | 0.02 |
| PAI-1                | SERPINE1           | -0.12 | 0.04 | -0.09 | 0.36 | -0.13 | 0.00 | -0.04 | 0.64 | -0.01 | 0.89 | -0.04 | 0.69 |
| PAICS                | PAICS              | 0.16  | 0.14 | -0.13 | 0.19 | -0.06 | 0.58 | 0.07  | 0.48 | -0.22 | 0.09 | 0.29  | 0.03 |
| PAK1                 | PAK1               | 0.11  | 0.21 | -0.20 | 0.25 | 0.12  | 0.38 | 0.31  | 0.12 | 0.00  | 0.97 | 0.31  | 0.12 |
| PAK4                 | PAK4               | -0.09 | 0.25 | -0.13 | 0.22 | -0.04 | 0.38 | 0.09  | 0.37 | 0.05  | 0.52 | 0.04  | 0.71 |
| PAR                  | [PAR Modification] | 1.26  | 0.05 | -0.08 | 0.87 | 1.18  | 0.13 | 1.26  | 0.12 | -0.08 | 0.89 | 1.34  | 0.06 |
| PARG                 | PARG               | 0.07  | 0.50 | 0.20  | 0.06 | 0.24  | 0.03 | 0.04  | 0.60 | 0.17  | 0.13 | -0.13 | 0.24 |
| PARP                 | PARP1              | 0.16  | 0.26 | 0.09  | 0.49 | 0.11  | 0.41 | 0.02  | 0.76 | -0.05 | 0.53 | 0.07  | 0.30 |
| Patched              | PTCH1              | -0.01 | 0.59 | 0.04  | 0.30 | -0.10 | 0.46 | -0.15 | 0.33 | -0.09 | 0.52 | -0.06 | 0.18 |
| PAX6                 | PAX6               | -0.08 | 0.24 | -0.11 | 0.12 | -0.03 | 0.57 | 0.08  | 0.28 | 0.05  | 0.49 | 0.03  | 0.71 |
| PAX8                 | PAX8               | -0.12 | 0.22 | -0.07 | 0.36 | -0.13 | 0.04 | -0.06 | 0.45 | -0.01 | 0.91 | -0.05 | 0.62 |
| Paxillin             | PXN                | 0.12  | 0.17 | -0.05 | 0.50 | 0.08  | 0.33 | 0.13  | 0.10 | -0.04 | 0.56 | 0.17  | 0.06 |
| PCNA                 | PCNA               | 0.16  | 0.25 | 0.19  | 0.18 | 0.12  | 0.34 | -0.07 | 0.28 | -0.03 | 0.55 | -0.04 | 0.23 |
| PD-1                 | PDCD1              | 0.01  | 0.86 | 0.00  | 0.95 | 0.00  | 0.95 | 0.00  | 1.00 | 0.00  | 0.95 | 0.00  | 0.95 |
| PD-L1                | CD274              | 0.25  | 0.44 | 0.37  | 0.28 | 0.27  | 0.40 | -0.11 | 0.06 | 0.02  | 0.90 | -0.12 | 0.36 |

|                       |         |       |      |       |      |       |      |       |      |       |      |       |      |
|-----------------------|---------|-------|------|-------|------|-------|------|-------|------|-------|------|-------|------|
| Pdcd4                 | PDCD4   | 0.08  | 0.52 | -0.04 | 0.72 | 0.12  | 0.34 | 0.16  | 0.26 | 0.04  | 0.75 | 0.12  | 0.38 |
| PDH                   | DLAT    | 0.10  | 0.48 | 0.26  | 0.13 | 0.20  | 0.22 | -0.07 | 0.49 | 0.09  | 0.37 | -0.16 | 0.14 |
| PDHA1                 | PDHA1   | -0.19 | 0.11 | -0.17 | 0.32 | -0.15 | 0.10 | 0.02  | 0.89 | 0.04  | 0.69 | -0.02 | 0.91 |
| PDHK1                 | PDK1    | -0.04 | 0.21 | -0.02 | 0.61 | -0.03 | 0.60 | -0.01 | 0.80 | 0.02  | 0.74 | -0.03 | 0.19 |
| PDK1                  | PDPK1   | -0.16 | 0.05 | -0.08 | 0.03 | -0.23 | 0.23 | -0.15 | 0.38 | -0.07 | 0.66 | -0.08 | 0.21 |
| PDK1_pS241            | PDPK1   | -0.20 | 0.08 | -0.11 | 0.27 | -0.25 | 0.05 | -0.14 | 0.14 | -0.05 | 0.56 | -0.09 | 0.19 |
| PEA-15                | PEA15   | -0.02 | 0.86 | 0.03  | 0.80 | -0.02 | 0.85 | -0.05 | 0.37 | 0.00  | 0.97 | -0.05 | 0.61 |
| PEA-15_pS116          | PEA15   | -0.07 | 0.42 | 0.05  | 0.57 | -0.05 | 0.60 | -0.10 | 0.37 | 0.03  | 0.80 | -0.12 | 0.27 |
| PERK                  | EIF2AK3 | -0.02 | 0.84 | 0.23  | 0.04 | 0.00  | 1.00 | -0.23 | 0.11 | 0.02  | 0.87 | -0.25 | 0.07 |
| PHGDH                 | PHGDH   | 0.11  | 0.63 | -0.16 | 0.43 | 0.00  | 0.99 | 0.16  | 0.47 | -0.11 | 0.64 | 0.27  | 0.22 |
| PHLPP                 | PHLPP1  | 0.14  | 0.18 | 0.19  | 0.05 | 0.32  | 0.01 | 0.13  | 0.12 | 0.18  | 0.10 | -0.06 | 0.54 |
| PI3K-p110-a           | PIK3CA  | -0.13 | 0.02 | 0.07  | 0.11 | 0.00  | 0.97 | -0.07 | 0.21 | 0.14  | 0.04 | -0.20 | 0.00 |
| PI3K-p110-b           | PIK3CB  | -0.01 | 0.74 | 0.06  | 0.66 | 0.03  | 0.78 | -0.02 | 0.90 | 0.05  | 0.72 | -0.07 | 0.61 |
| PI3K-p85              | PIK3R1  | -0.18 | 0.06 | -0.11 | 0.08 | -0.19 | 0.03 | -0.07 | 0.25 | 0.00  | 0.97 | -0.07 | 0.34 |
| PKA-a                 | PRKAR1A | 0.46  | 0.00 | -0.24 | 0.01 | 0.24  | 0.04 | 0.47  | 0.01 | -0.22 | 0.05 | 0.70  | 0.00 |
| PKC-a-b-II_pT638_T641 | PRKCA   | 0.01  | 0.95 | -0.01 | 0.80 | 0.01  | 0.90 | 0.02  | 0.71 | 0.00  | 0.98 | 0.02  | 0.84 |
| PKC-b-II_pS660        | PRKCA   | -0.09 | 0.26 | 0.01  | 0.97 | -0.10 | 0.21 | -0.11 | 0.45 | -0.01 | 0.87 | -0.10 | 0.49 |
| PKC-delta_pS664       | PRKCD   | -0.06 | 0.04 | -0.02 | 0.62 | -0.03 | 0.71 | -0.01 | 0.93 | 0.03  | 0.67 | -0.04 | 0.37 |
| PKCa                  | PRKCA   | 0.10  | 0.34 | 0.03  | 0.68 | 0.22  | 0.06 | 0.19  | 0.02 | 0.12  | 0.25 | 0.07  | 0.45 |
| PKM2                  | PKM     | -0.05 | 0.82 | -0.18 | 0.35 | -0.35 | 0.03 | -0.17 | 0.38 | -0.30 | 0.23 | 0.13  | 0.60 |
| PLC-gamma1            | PLCG1   | 0.08  | 0.68 | -0.12 | 0.50 | -0.06 | 0.77 | 0.06  | 0.62 | -0.14 | 0.39 | 0.20  | 0.17 |
| PLC-gamma1_pS1248     | PLCG1   | 0.00  | 0.99 | -0.24 | 0.15 | -0.32 | 0.09 | -0.08 | 0.31 | -0.32 | 0.01 | 0.24  | 0.02 |
| PLC-gamma2_pY759      | PLCG2   | -0.06 | 0.27 | -0.07 | 0.25 | -0.10 | 0.03 | -0.03 | 0.59 | -0.05 | 0.30 | 0.02  | 0.76 |
| PLK1                  | PLK1    | -0.34 | 0.06 | -0.18 | 0.36 | -0.32 | 0.06 | -0.14 | 0.43 | 0.02  | 0.83 | -0.16 | 0.36 |
| PMS2                  | PMS2    | 0.07  | 0.64 | 0.21  | 0.06 | 0.21  | 0.19 | 0.01  | 0.97 | 0.14  | 0.45 | -0.14 | 0.41 |
| Porin                 | VDAC1   | 0.05  | 0.57 | 0.19  | 0.18 | 0.07  | 0.33 | -0.11 | 0.37 | 0.03  | 0.74 | -0.14 | 0.29 |
| PR                    | PGR     | 0.01  | 0.91 | 0.02  | 0.56 | 0.08  | 0.37 | 0.05  | 0.50 | 0.07  | 0.44 | -0.02 | 0.76 |
| PRAS40                | AKT1S1  | -0.08 | 0.13 | -0.08 | 0.21 | -0.07 | 0.26 | 0.01  | 0.84 | 0.01  | 0.83 | 0.00  | 0.99 |
| PRAS40_pT246          | AKT1S1  | -0.35 | 0.02 | -0.14 | 0.17 | -0.36 | 0.06 | -0.22 | 0.17 | -0.01 | 0.93 | -0.21 | 0.00 |
| PRC1_pT481            | PRC1    | 0.03  | 0.80 | 0.10  | 0.39 | 0.12  | 0.46 | 0.02  | 0.89 | 0.09  | 0.51 | -0.07 | 0.34 |

|               |         |       |      |       |      |       |      |       |      |       |      |       |      |
|---------------|---------|-------|------|-------|------|-------|------|-------|------|-------|------|-------|------|
| PREX1         | PREX1   | 0.02  | 0.89 | 0.50  | 0.00 | 0.48  | 0.00 | -0.02 | 0.82 | 0.47  | 0.03 | -0.48 | 0.03 |
| PTEN          | PTEN    | 0.22  | 0.02 | 0.15  | 0.06 | 0.29  | 0.03 | 0.13  | 0.18 | 0.06  | 0.46 | 0.07  | 0.12 |
| PTPN12        | PTPN12  | -0.19 | 0.08 | -0.01 | 0.89 | -0.12 | 0.05 | -0.12 | 0.13 | 0.07  | 0.38 | -0.18 | 0.07 |
| Puma          | BBC3    | 0.17  | 0.08 | -0.07 | 0.14 | 0.09  | 0.04 | 0.16  | 0.01 | -0.08 | 0.31 | 0.24  | 0.04 |
| PYGB          | PYGB    | 0.03  | 0.52 | 0.01  | 0.91 | 0.01  | 0.92 | 0.00  | 0.97 | -0.02 | 0.71 | 0.02  | 0.80 |
| PYGM          | PYGM    | -0.08 | 0.09 | -0.01 | 0.89 | -0.04 | 0.56 | -0.03 | 0.66 | 0.04  | 0.55 | -0.07 | 0.23 |
| Pyk2_pY402    | PTK2B   | -0.15 | 0.03 | -0.01 | 0.93 | -0.04 | 0.33 | -0.03 | 0.55 | 0.11  | 0.07 | -0.14 | 0.06 |
| Rab11         | RAB11A  | 0.05  | 0.33 | 0.08  | 0.20 | 0.22  | 0.16 | 0.14  | 0.30 | 0.17  | 0.24 | -0.03 | 0.59 |
| Rab25         | RAB25   | 0.27  | 0.02 | 0.19  | 0.09 | 0.30  | 0.11 | 0.11  | 0.44 | 0.03  | 0.81 | 0.08  | 0.40 |
| Rad23A        | RAD23A  | 0.09  | 0.47 | -0.11 | 0.20 | 0.00  | 0.99 | 0.11  | 0.34 | -0.09 | 0.54 | 0.20  | 0.17 |
| Rad50         | RAD50   | 0.09  | 0.79 | 0.02  | 0.94 | -0.06 | 0.78 | -0.08 | 0.55 | -0.15 | 0.59 | 0.07  | 0.81 |
| Rad51         | RAD51   | 0.14  | 0.78 | -0.25 | 0.13 | 0.30  | 0.60 | 0.56  | 0.37 | 0.16  | 0.81 | 0.39  | 0.46 |
| Raptor        | RPTOR   | -0.03 | 0.76 | 0.01  | 0.59 | -0.08 | 0.01 | -0.09 | 0.04 | -0.05 | 0.69 | -0.05 | 0.68 |
| Rb-M-Q        | RB1     | -0.36 | 0.24 | -0.10 | 0.04 | -0.20 | 0.11 | -0.10 | 0.32 | 0.16  | 0.55 | -0.26 | 0.36 |
| RBM15         | RBM15   | 0.09  | 0.85 | 0.18  | 0.76 | 0.00  | 1.00 | -0.18 | 0.80 | -0.09 | 0.88 | -0.09 | 0.88 |
| Rb_pS807_S811 | RB1     | 0.02  | 0.86 | -0.20 | 0.09 | -0.09 | 0.55 | 0.11  | 0.49 | -0.11 | 0.50 | 0.22  | 0.13 |
| Rheb          | RHEB    | -0.18 | 0.10 | -0.18 | 0.06 | -0.21 | 0.04 | -0.03 | 0.63 | -0.03 | 0.69 | 0.00  | 1.00 |
| Rictor        | RICTOR  | -0.72 | 0.01 | -0.06 | 0.15 | -0.62 | 0.00 | -0.56 | 0.00 | 0.10  | 0.38 | -0.66 | 0.01 |
| Rictor_pT1135 | RICTOR  | -0.06 | 0.32 | 0.03  | 0.62 | -0.01 | 0.85 | -0.05 | 0.54 | 0.05  | 0.48 | -0.10 | 0.19 |
| RIP           | RIPK1   | -0.14 | 0.10 | 0.02  | 0.74 | -0.09 | 0.57 | -0.11 | 0.48 | 0.05  | 0.75 | -0.16 | 0.01 |
| RIP3          | RIPK3   | -0.01 | 0.82 | 0.00  | 0.97 | -0.03 | 0.47 | -0.03 | 0.73 | -0.02 | 0.78 | -0.01 | 0.91 |
| RPA32         | RPA2    | 0.25  | 0.18 | 0.11  | 0.26 | 0.48  | 0.00 | 0.37  | 0.02 | 0.23  | 0.20 | 0.14  | 0.41 |
| RPA32_pS4_S8  | RPA2    | 0.02  | 0.93 | 0.08  | 0.72 | 0.11  | 0.58 | 0.03  | 0.90 | 0.09  | 0.64 | -0.06 | 0.77 |
| RRM1          | RRM1    | -0.09 | 0.09 | 0.03  | 0.35 | -0.04 | 0.68 | -0.07 | 0.44 | 0.05  | 0.57 | -0.12 | 0.03 |
| RRM2          | RRM2    | 0.89  | 0.01 | 0.07  | 0.19 | 0.79  | 0.00 | 0.72  | 0.00 | -0.10 | 0.41 | 0.82  | 0.01 |
| RSK           | RPS6KA1 | -0.04 | 0.66 | -0.08 | 0.18 | -0.09 | 0.26 | -0.01 | 0.93 | -0.04 | 0.68 | 0.04  | 0.69 |
| RSK1          | RPS6KA1 | 0.00  | 0.96 | -0.03 | 0.74 | -0.16 | 0.48 | -0.12 | 0.57 | -0.16 | 0.46 | 0.04  | 0.66 |
| S100A4        | S100A4  | -0.06 | 0.49 | 0.08  | 0.23 | 0.03  | 0.58 | -0.05 | 0.32 | 0.09  | 0.30 | -0.13 | 0.16 |
| S6            | RPS6    | -0.07 | 0.25 | 0.03  | 0.80 | -0.06 | 0.70 | -0.10 | 0.62 | 0.01  | 0.96 | -0.10 | 0.47 |
| S6_pS235_S236 | RPS6    | -1.45 | 0.01 | -0.52 | 0.10 | -1.93 | 0.01 | -1.41 | 0.02 | -0.48 | 0.24 | -0.93 | 0.01 |

|               |        |       |      |       |      |       |      |       |      |       |      |       |      |
|---------------|--------|-------|------|-------|------|-------|------|-------|------|-------|------|-------|------|
| S6_pS240_S244 | RPS6   | -1.55 | 0.01 | -0.49 | 0.15 | -1.90 | 0.01 | -1.41 | 0.03 | -0.35 | 0.40 | -1.06 | 0.03 |
| SCD           | SCD    | 0.00  | 0.99 | 0.24  | 0.23 | 0.18  | 0.34 | -0.05 | 0.58 | 0.19  | 0.24 | -0.24 | 0.15 |
| SDHA          | SDHA   | 0.06  | 0.78 | -0.01 | 0.95 | -0.02 | 0.94 | 0.00  | 0.99 | -0.07 | 0.68 | 0.07  | 0.75 |
| SF2           | SRSF1  | -0.04 | 0.73 | 0.07  | 0.43 | -0.01 | 0.94 | -0.08 | 0.47 | 0.03  | 0.82 | -0.10 | 0.31 |
| SFRP1         | SFRP1  | 0.00  | 0.98 | 0.00  | 0.99 | 0.07  | 0.34 | 0.07  | 0.35 | 0.07  | 0.42 | 0.00  | 0.99 |
| SGK1          | SGK1   | -0.13 | 0.13 | -0.02 | 0.82 | -0.09 | 0.20 | -0.07 | 0.24 | 0.04  | 0.49 | -0.11 | 0.15 |
| SGK3          | SGK3   | -0.27 | 0.01 | 0.22  | 0.04 | -0.05 | 0.48 | -0.27 | 0.02 | 0.21  | 0.03 | -0.49 | 0.00 |
| Shc_pY317     | SHC1   | -0.39 | 0.28 | -0.02 | 0.95 | -0.28 | 0.42 | -0.26 | 0.30 | 0.11  | 0.35 | -0.37 | 0.17 |
| SHP-2_pY542   | PTPN11 | 0.12  | 0.46 | -0.46 | 0.00 | -0.43 | 0.00 | 0.03  | 0.61 | -0.55 | 0.03 | 0.58  | 0.04 |
| SHP2          | PTPN11 | -0.11 | 0.33 | 0.05  | 0.52 | -0.07 | 0.29 | -0.12 | 0.17 | 0.04  | 0.72 | -0.16 | 0.20 |
| SLC1A5        | SLC1A5 | -0.07 | 0.46 | -0.04 | 0.69 | -0.21 | 0.05 | -0.18 | 0.10 | -0.14 | 0.18 | -0.04 | 0.72 |
| Slfn11-G-C    | SLFN11 | 0.01  | 0.87 | 0.01  | 0.92 | 0.04  | 0.52 | 0.03  | 0.69 | 0.03  | 0.50 | 0.00  | 0.99 |
| Smac-M-Q      | DIABLO | -0.02 | 0.75 | 0.01  | 0.85 | 0.00  | 0.98 | -0.01 | 0.90 | 0.02  | 0.79 | -0.03 | 0.54 |
| Smad1         | SMAD1  | -0.03 | 0.46 | 0.07  | 0.01 | -0.02 | 0.67 | -0.09 | 0.10 | 0.01  | 0.80 | -0.10 | 0.07 |
| Smad3         | SMAD3  | 0.11  | 0.02 | 0.08  | 0.07 | 0.15  | 0.06 | 0.06  | 0.27 | 0.03  | 0.51 | 0.03  | 0.44 |
| Smad4         | SMAD4  | 0.25  | 0.19 | 0.05  | 0.80 | 0.32  | 0.24 | 0.27  | 0.29 | 0.06  | 0.77 | 0.21  | 0.21 |
| Snail-M-Q     | SNAI1  | -0.05 | 0.30 | 0.00  | 0.99 | -0.11 | 0.05 | -0.10 | 0.16 | -0.06 | 0.16 | -0.05 | 0.46 |
| SOD1          | SOD1   | 0.08  | 0.07 | 0.05  | 0.24 | 0.05  | 0.33 | 0.01  | 0.91 | -0.03 | 0.58 | 0.03  | 0.37 |
| SOD2          | SOD2   | 0.07  | 0.37 | 0.05  | 0.51 | 0.11  | 0.35 | 0.07  | 0.55 | 0.04  | 0.70 | 0.02  | 0.70 |
| Sox17         | SOX17  | -0.10 | 0.09 | -0.10 | 0.27 | -0.23 | 0.02 | -0.13 | 0.21 | -0.13 | 0.08 | 0.00  | 0.97 |
| Sox2          | SOX2   | 0.22  | 0.06 | 0.10  | 0.08 | 0.03  | 0.87 | -0.07 | 0.73 | -0.19 | 0.37 | 0.12  | 0.18 |
| Src           | SRC    | -0.13 | 0.07 | -0.01 | 0.92 | -0.10 | 0.02 | -0.09 | 0.30 | 0.03  | 0.52 | -0.12 | 0.20 |
| Src_pY416     | SRC    | -0.28 | 0.13 | -0.43 | 0.07 | -0.44 | 0.04 | -0.02 | 0.92 | -0.16 | 0.16 | 0.15  | 0.38 |
| Src_pY527     | SRC    | -0.46 | 0.02 | -0.08 | 0.68 | -0.48 | 0.02 | -0.40 | 0.12 | -0.02 | 0.88 | -0.38 | 0.13 |
| Stat1_pY701   | STAT1  | 0.20  | 0.22 | 0.21  | 0.14 | 0.23  | 0.21 | 0.02  | 0.91 | 0.03  | 0.87 | -0.01 | 0.94 |
| Stat3         | STAT3  | -0.07 | 0.41 | 0.02  | 0.86 | 0.23  | 0.11 | 0.22  | 0.16 | 0.31  | 0.06 | -0.09 | 0.44 |
| Stat3_pY705   | STAT3  | -0.05 | 0.60 | -0.02 | 0.86 | 0.00  | 0.98 | 0.02  | 0.88 | 0.05  | 0.67 | -0.04 | 0.49 |
| Stat5a        | STAT5A | 0.05  | 0.23 | 0.02  | 0.84 | 0.03  | 0.57 | 0.01  | 0.93 | -0.02 | 0.71 | 0.03  | 0.79 |
| Stathmin-1    | STMN1  | -0.04 | 0.78 | -0.13 | 0.35 | -0.15 | 0.31 | -0.02 | 0.88 | -0.12 | 0.35 | 0.10  | 0.40 |
| STING         | STING1 | 0.08  | 0.67 | 0.15  | 0.40 | 0.20  | 0.31 | 0.05  | 0.66 | 0.12  | 0.37 | -0.07 | 0.49 |

|                  |        |       |      |       |      |       |      |       |      |       |      |       |      |
|------------------|--------|-------|------|-------|------|-------|------|-------|------|-------|------|-------|------|
| Syk              | SYK    | 0.09  | 0.38 | 0.03  | 0.78 | 0.17  | 0.21 | 0.14  | 0.28 | 0.08  | 0.44 | 0.06  | 0.53 |
| Tau              | MAPT   | 0.10  | 0.05 | -0.06 | 0.71 | 0.07  | 0.47 | 0.13  | 0.49 | -0.04 | 0.68 | 0.16  | 0.37 |
| TAZ              | WWTR1  | -0.28 | 0.02 | 0.02  | 0.81 | -0.23 | 0.06 | -0.24 | 0.05 | 0.06  | 0.49 | -0.30 | 0.01 |
| TFAM             | TFAM   | -0.14 | 0.27 | 0.08  | 0.71 | 0.03  | 0.92 | -0.05 | 0.89 | 0.18  | 0.58 | -0.22 | 0.35 |
| TFRC             | TFRC   | 0.09  | 0.64 | 0.19  | 0.29 | 0.09  | 0.66 | -0.10 | 0.55 | 0.00  | 0.99 | -0.11 | 0.49 |
| TIGAR            | TIGAR  | 0.54  | 0.62 | 0.69  | 0.51 | 0.57  | 0.61 | -0.12 | 0.84 | 0.02  | 0.97 | -0.15 | 0.81 |
| Transglutaminase | TGM2   | -0.02 | 0.94 | -0.01 | 0.96 | 0.08  | 0.77 | 0.09  | 0.75 | 0.10  | 0.75 | -0.01 | 0.97 |
| TRAP1            | TRAP1  | 0.13  | 0.25 | 0.02  | 0.85 | 0.05  | 0.64 | 0.03  | 0.77 | -0.08 | 0.50 | 0.11  | 0.33 |
| TRIM25           | TRIM25 | -0.08 | 0.46 | 0.02  | 0.87 | 0.04  | 0.72 | 0.02  | 0.82 | 0.12  | 0.27 | -0.10 | 0.32 |
| TRIP13           | TRIP13 | 0.09  | 0.49 | -0.11 | 0.14 | -0.02 | 0.79 | 0.09  | 0.15 | -0.10 | 0.41 | 0.20  | 0.18 |
| TSC1             | TSC1   | -0.10 | 0.37 | 0.01  | 0.82 | -0.06 | 0.42 | -0.07 | 0.28 | 0.04  | 0.69 | -0.11 | 0.32 |
| TTF1             | NKX2-1 | -0.02 | 0.89 | 0.17  | 0.40 | 0.04  | 0.86 | -0.13 | 0.60 | 0.06  | 0.80 | -0.19 | 0.38 |
| Tuberin          | TSC2   | 0.01  | 0.93 | 0.00  | 0.99 | 0.01  | 0.95 | 0.01  | 0.96 | 0.00  | 1.00 | 0.01  | 0.92 |
| Tuberin_pT1462   | TSC2   | -0.05 | 0.34 | 0.04  | 0.63 | -0.11 | 0.24 | -0.15 | 0.18 | -0.06 | 0.46 | -0.09 | 0.29 |
| TUFM             | TUFM   | 0.08  | 0.52 | 0.07  | 0.52 | 0.09  | 0.43 | 0.02  | 0.80 | 0.01  | 0.92 | 0.01  | 0.92 |
| Twist            | TWIST1 | -0.04 | 0.16 | 0.02  | 0.66 | -0.07 | 0.34 | -0.08 | 0.26 | -0.02 | 0.70 | -0.06 | 0.22 |
| Tyro3            | TYRO3  | -0.04 | 0.30 | -0.01 | 0.89 | -0.09 | 0.36 | -0.08 | 0.44 | -0.04 | 0.62 | -0.03 | 0.61 |
| U-Histone-H2B    | H2BC3  | -0.10 | 0.28 | -0.03 | 0.74 | -0.03 | 0.85 | 0.00  | 0.99 | 0.07  | 0.64 | -0.07 | 0.44 |
| UBAC1            | UBAC1  | -0.10 | 0.12 | -0.15 | 0.03 | -0.17 | 0.11 | -0.02 | 0.82 | -0.07 | 0.40 | 0.06  | 0.25 |
| UBQLN4           | UBQLN4 | 0.06  | 0.36 | 0.05  | 0.67 | 0.10  | 0.44 | 0.05  | 0.74 | 0.04  | 0.73 | 0.01  | 0.95 |
| UGT1A            | UGT1A1 | 0.06  | 0.70 | -0.09 | 0.42 | 0.06  | 0.61 | 0.15  | 0.04 | -0.01 | 0.97 | 0.15  | 0.32 |
| ULK1_pS757       | ULK1   | -0.43 | 0.01 | 0.00  | 0.91 | -0.41 | 0.08 | -0.41 | 0.09 | 0.02  | 0.89 | -0.43 | 0.02 |
| UQCRC2           | UQCRC2 | -0.20 | 0.18 | -0.15 | 0.14 | -0.07 | 0.11 | 0.08  | 0.36 | 0.13  | 0.32 | -0.06 | 0.66 |
| UVRAG            | UVRAG  | -0.02 | 0.56 | -0.01 | 0.80 | -0.04 | 0.20 | -0.02 | 0.67 | -0.01 | 0.72 | -0.01 | 0.87 |
| VASP             | VASP   | 0.10  | 0.59 | -0.01 | 0.90 | 0.15  | 0.57 | 0.16  | 0.53 | 0.05  | 0.84 | 0.11  | 0.50 |
| VAV1             | VAV1   | 0.02  | 0.80 | 0.17  | 0.04 | 0.19  | 0.15 | 0.02  | 0.82 | 0.18  | 0.18 | -0.15 | 0.06 |
| VEGFR-2          | KDR    | -0.15 | 0.43 | 0.23  | 0.44 | -0.02 | 0.92 | -0.25 | 0.40 | 0.13  | 0.51 | -0.39 | 0.21 |
| VEGFR-2_pY1175   | KDR    | 0.09  | 0.35 | -0.48 | 0.01 | -0.43 | 0.02 | 0.05  | 0.56 | -0.53 | 0.01 | 0.58  | 0.01 |
| VHL              | VHL    | 0.02  | 0.65 | 0.08  | 0.15 | 0.14  | 0.16 | 0.05  | 0.54 | 0.11  | 0.23 | -0.06 | 0.34 |
| VHL-EPPK1        | EPPK1  | 0.13  | 0.90 | -0.33 | 0.55 | 0.58  | 0.62 | 0.91  | 0.45 | 0.46  | 0.75 | 0.45  | 0.67 |

|            |       |       |      |       |      |       |      |       |      |       |      |       |      |
|------------|-------|-------|------|-------|------|-------|------|-------|------|-------|------|-------|------|
| Vinculin   | VCL   | -0.33 | 0.05 | -0.05 | 0.65 | -0.28 | 0.02 | -0.24 | 0.09 | 0.05  | 0.67 | -0.29 | 0.08 |
| Wee1       | WEE1  | 0.71  | 0.00 | 0.08  | 0.46 | 0.77  | 0.00 | 0.69  | 0.00 | 0.06  | 0.51 | 0.62  | 0.00 |
| Wee1_pS642 | WEE1  | 0.47  | 0.00 | 0.10  | 0.26 | 0.50  | 0.01 | 0.40  | 0.01 | 0.02  | 0.72 | 0.38  | 0.02 |
| WIPI1      | WIPI1 | -0.02 | 0.65 | 0.03  | 0.51 | 0.02  | 0.78 | -0.01 | 0.91 | 0.05  | 0.57 | -0.06 | 0.14 |
| WIPI2      | WIPI2 | 0.02  | 0.72 | -0.03 | 0.58 | 0.07  | 0.46 | 0.10  | 0.32 | 0.05  | 0.58 | 0.05  | 0.31 |
| XIAP       | XIAP  | -0.49 | 0.01 | -0.05 | 0.47 | -0.42 | 0.03 | -0.37 | 0.07 | 0.07  | 0.55 | -0.44 | 0.00 |
| XPA        | XPA   | -0.31 | 0.04 | 0.12  | 0.07 | -0.08 | 0.23 | -0.20 | 0.02 | 0.23  | 0.07 | -0.43 | 0.02 |
| XPF        | ERCC4 | -0.11 | 0.24 | -0.11 | 0.07 | -0.11 | 0.28 | -0.01 | 0.93 | 0.00  | 0.98 | 0.00  | 0.95 |
| XRCC1      | XRCC1 | -0.09 | 0.02 | -0.09 | 0.27 | -0.12 | 0.05 | -0.03 | 0.65 | -0.03 | 0.50 | -0.12 | 0.15 |
| YAP        | YAP1  | -0.06 | 0.37 | -0.08 | 0.21 | -0.03 | 0.69 | 0.05  | 0.54 | 0.03  | 0.77 | 0.03  | 0.69 |
| YAP_pS127  | YAP1  | -0.13 | 0.17 | 0.11  | 0.38 | -0.18 | 0.09 | -0.29 | 0.07 | -0.06 | 0.40 | -0.24 | 0.12 |
| YB1_pS102  | YBX1  | -0.04 | 0.52 | -0.05 | 0.41 | -0.05 | 0.58 | -0.01 | 0.94 | -0.02 | 0.83 | 0.01  | 0.76 |
| YES1       | YES1  | -0.22 | 0.03 | -0.10 | 0.21 | -0.17 | 0.03 | -0.07 | 0.35 | 0.05  | 0.51 | -0.12 | 0.19 |
| ZAP-70     | ZAP70 | -0.12 | 0.12 | -0.16 | 0.31 | -0.20 | 0.15 | -0.04 | 0.82 | -0.08 | 0.47 | 0.04  | 0.74 |
| ZEB1       | ZEB1  | 0.04  | 0.36 | 0.14  | 0.03 | 0.11  | 0.08 | -0.03 | 0.60 | 0.07  | 0.20 | -0.10 | 0.07 |

## Supplementary Table S3

### HER2 Signaling Pathway in Breast Cancer

Extracted from Ingenuity Pathway Analyses (IPA) software  
(version 57662101; QIAGEN Inc.) May 12 2021.

Content Version: 62089861 (Release Date: 2021-02-17)

| <b>Gene</b> | <b>Symbol</b> |
|-------------|---------------|
| AKT         | AKT           |
| AP1         | AP1           |
| aPKC        | aPKC          |
| AREG        | AREG          |
| CDKN2A      | ARF           |
| BAD         | BAD           |
| BIM         | BIM           |
| BIRC5       | BIRC5         |
| CASP3       | Casp3/6/7     |
| CASP6       | Casp3/6/7     |
| CASP7       | Casp3/6/7     |
| CASP9       | CASP9         |
| CDC42       | CDC42         |
| CDK4        | CDK4          |
| COPS6       | COPS6         |
| PTGS2       | COX2          |
| CCND1       | CyclinD1      |
| CCNE1       | CyclinE       |
| E2F1        | E2F-DP1       |
| EGF         | EGF           |
| ELK1        | ELK1          |
| MAPK1       | ERK1/2        |
| ETS1        | ETS           |
| FOXO1       | FOXO1A        |
| FOXO3       | FOXO3         |
| GRB2        | GRB2          |
| GSK3B       | GSK3          |
| HBEGF       | HBEGF         |
| EGFR        | HER-1(EGFR)   |
| ERBB2       | HER-2(ERBB2)  |
| ERBB3       | HER-3(ERBB3)  |
| IKKB        | IKK family    |
| CHUK        | Ikb           |
| IL1A        | IL1A          |
| KPNB1       | KPNB1         |
| MDM2        | MDM2          |



|         |            |
|---------|------------|
| MAP2K1  | MEK1/2     |
| MAP2K2  | MEK1/2     |
| MMP2    | MMP2       |
| MTOR    | mTORC1     |
| MYC     | MYC        |
| NFKB1   | NFKB       |
| NPC1    | NPC        |
| NRG1    | NRG1       |
| CDKN1A  | p21CIP1    |
| CDKN1B  | p27KIP1    |
| TP53    | p53        |
| RPS6KB1 | P70S6K     |
| PARD3   | PAR3       |
| PARD6A  | PAR6       |
| PDK1    | PDK1       |
| PGR     | PGR        |
| PIK3CA  | PI3K       |
| PRKCA   | PKC        |
| PLCG1   | PLCgamma   |
| PTEN    | PTEN       |
| RAF1    | RAF        |
| HRAS    | RAS        |
| KRAS    | RAS        |
| RB1     | RB         |
| RHEB    | RHEB       |
| RPS6    | RPS6       |
| SMAD3   | SMAD3      |
| SMAD4   | SMAD4      |
| SOS1    | SOS        |
| SP1     | SP1        |
| SRC     | SRC        |
| STAT3   | STAT3      |
| TGFA    | TGFa       |
| TP53RK  | TP53RK     |
| TSC1    | TSC1       |
| TSC2    | TSC2       |
| XIAP    | XIAP       |
| ITGB3   | B-Integrin |
| ITGB5   | B-Integrin |
| ITGB7   | B-Integrin |

## Supplementary Table S3

### Overlapping elements in mRNAs encoding for the regulated proteins (Tables 1-3) and HER2 Signaling Pathway in Breast Cancer:

6 common elements in "HER2pathway" and "miR-101-5p":

GSK3B

ERBB3

MTOR

RPS6

SRC

XIAP

5 common elements in "HER2pathway" and "miR-101-5p + Lapatinib and Trastuzumab":

ERBB3

MTOR

RPS6

SRC

XIAP

1 common elements in "HER2pathway" and "Lapatinib and Trastuzumab":

EGFR

## Supplementary Table S3

### List of 10 proteins that exclusively have their expression level altered upon treatment with miR-101-5p and Trastuzumab and Lapatinib

(proteins not altered by either monotreatment)

| Gene    | Protein     | FC    | p-value |
|---------|-------------|-------|---------|
| ASNS    | ASNS        | -0.68 | 0.03    |
| PRKAA1  | AMPKa_pT172 | -0.58 | 0.01    |
| SLC16A3 | MCT4        | -0.48 | 0.03    |
| ERBB3   | HER3_pY1289 | -0.46 | 0.01    |
| SRC     | Src_pY416   | -0.44 | 0.04    |
| GYS1    | Gys         | -0.44 | 0.02    |
| GRB7    | GRB7        | 0.41  | 0.04    |
| H2AX    | H2AX_pS140  | 0.47  | 0.00    |
| RPA2    | RPA32       | 0.48  | 0.00    |
| H2AX    | H2AX_pS139  | 0.54  | 0.01    |

### Pathway analysis on the 10 proteins

Pathway analysis performed in Ingenuity Pathway Analyses (IPA) software (version 57662101; QIAGEN Inc.) © 2000-2021 QIAGEN. All rights reserved.

#### Top 10 Ingenuity Canonical Pathways

Neuregulin Signaling  
Agrin Interactions at Neuromuscular Junction  
Asparagine Biosynthesis I  
IL-15 Production  
Ferroptosis Signaling Pathway  
Endocannabinoid Cancer Inhibition Pathway  
HER-2 Signaling in Breast Cancer  
Glycogen Biosynthesis II (from UDP-D-Glucose)  
Integrin Signaling  
AMPK Signaling
